# Supplementary material for: An in vivo control map for the eukaryotic mRNA translation machinery
Source: PubMed Central journal article supplement — Mol Syst Biol. 2013 Jan 22;9:635. doi: 10.1038/msb.2012.73 (PMC3564266; doi:10.1038/msb.2012.73), 2013-01-22
Supplement: msb201273-s1.pdf [file msb201273-s1.pdf]

## **Supplementary Information**

**Firczuk et al. 2012**

### **Table of Content**

**Supplementary text – model equations**

**Supplementary Tables I – III**

**References for Supplementary Table III**

**Supplementary Tables IV – VI**

**[Supplementary Table Va/b also available as Excel data sheets]**

**Supplementary Figures 1 – 6**

**Supplementary Figure legends 1 – 6**

## Full mathematical model

$$\begin{aligned}
\frac{d[\text{eIF2\_GDP}]}{dt} &= - (k_{1r1} \cdot [\text{eIF2\_GDP}] \cdot [\text{eIF2B}] - k_{2r1} \cdot [\text{eIF2\_GDP\_eIF2B}]) \\
&\quad + k_{r18} \cdot [60\text{S}] \cdot [48\text{S\_Ded1\_eIF5B\_GTP}] \cdot \text{mRNA\_init\_free} \\
\frac{d[\text{eIF2B}]}{dt} &= - (k_{1r1} \cdot [\text{eIF2\_GDP}] \cdot [\text{eIF2B}] - k_{2r1} \cdot [\text{eIF2\_GDP\_eIF2B}]) \\
&\quad + (k_{1r2} \cdot [\text{eIF2\_GDP\_eIF2B}] - k_{2r2} \cdot [\text{eIF2\_GTP}] \cdot [\text{eIF2B}]) \\
\frac{d[\text{eIF2\_GDP\_eIF2B}]}{dt} &= + (k_{1r1} \cdot [\text{eIF2\_GDP}] \cdot [\text{eIF2B}] - k_{2r1} \cdot [\text{eIF2\_GDP\_eIF2B}]) \\
&\quad - (k_{1r2} \cdot [\text{eIF2\_GDP\_eIF2B}] - k_{2r2} \cdot [\text{eIF2\_GTP}] \cdot [\text{eIF2B}]) \\
\frac{d[\text{eIF2\_GTP}]}{dt} &= k_{1r2} \cdot [\text{eIF2\_GDP\_eIF2B}] - k_{2r2} \cdot [\text{eIF2\_GTP}] \cdot [\text{eIF2B}] \\
&\quad - (k_{1r3} \cdot [\text{eIF2\_GTP}] \cdot [\text{Met-tRNA}] - k_{2r3} \cdot [\text{eIF2\_GTP\_Met-tRNA}]) \\
\frac{d[\text{eIF2\_GTP\_Met-tRNA}]}{dt} &= k_{1r3} \cdot [\text{eIF2\_GTP}] \cdot [\text{Met-tRNA}] \\
&\quad - k_{2r3} \cdot [\text{eIF2\_GTP\_Met-tRNA}] \\
&\quad - (k_{1r5} \cdot [\text{eIF2\_GTP\_Met-tRNA}] \cdot [\text{eIF3\_eIF5}] \\
&\quad - k_{2r5} \cdot [\text{eIF3\_eIF5\_eIF2\_GTP\_Met-tRNA}]) \\
\frac{d[\text{eIF3}]}{dt} &= k_{r18} \cdot [60\text{S}] \cdot [48\text{S\_Ded1\_eIF5B\_GTP}] \cdot \text{mRNA\_init\_free} \\
&\quad - (k_{1r4} \cdot [\text{eIF3}] \cdot [\text{eIF5}] - k_{2r4} \cdot [\text{eIF3\_eIF5}]) \\
\frac{d[\text{eIF5}]}{dt} &= k_{r18} \cdot [60\text{S}] \cdot [48\text{S\_Ded1\_eIF5B\_GTP}] \cdot \text{mRNA\_init\_free} \\
&\quad - (k_{1r4} \cdot [\text{eIF3}] \cdot [\text{eIF5}] - k_{2r4} \cdot [\text{eIF3\_eIF5}]) \\
\frac{d[\text{eIF3\_eIF5}]}{dt} &= k_{1r4} \cdot [\text{eIF3}] \cdot [\text{eIF5}] - k_{2r4} \cdot [\text{eIF3\_eIF5}] \\
&\quad - (k_{1r5} \cdot [\text{eIF2\_GTP\_Met-tRNA}] \cdot [\text{eIF3\_eIF5}] \\
&\quad - k_{2r5} \cdot [\text{eIF3\_eIF5\_eIF2\_GTP\_Met-tRNA}]) \\
\frac{d[\text{eIF3\_eIF5\_eIF2\_GTP\_Met-tRNA}]}{dt} &= k_{1r5} \cdot [\text{eIF2\_GTP\_Met-tRNA}] \cdot [\text{eIF3\_eIF5}] \\
&\quad - k_{2r5} \cdot [\text{eIF3\_eIF5\_eIF2\_GTP\_Met-tRNA}] \\
&\quad - (k_{1r6} \cdot [\text{eIF1}] \cdot [\text{eIF3\_eIF5\_eIF2\_GTP\_Met-tRNA}] \\
&\quad - k_{2r6} \cdot [\text{eIF1\_eIF3\_eIF5\_eIF2\_GTP\_Met-tRNA}]) \\
\frac{d[\text{eIF1}]}{dt} &= k_{r18} \cdot [60\text{S}] \cdot [48\text{S\_Ded1\_eIF5B\_GTP}] \cdot \text{mRNA\_init\_free} \\
&\quad - (k_{1r6} \cdot [\text{eIF1}] \cdot [\text{eIF3\_eIF5\_eIF2\_GTP\_Met-tRNA}] \\
&\quad - k_{2r6} \cdot [\text{eIF1\_eIF3\_eIF5\_eIF2\_GTP\_Met-tRNA}]) \\
\frac{d[\text{eIF1\_eIF3\_eIF5\_eIF2\_GTP\_Met-tRNA}]}{dt} &= k_{1r6} \cdot [\text{eIF1}] \cdot [\text{eIF3\_eIF5\_eIF2\_GTP\_Met-tRNA}] \\
&\quad - k_{2r6} \cdot [\text{eIF1\_eIF3\_eIF5\_eIF2\_GTP\_Met-tRNA}] \\
&\quad - k_{1r8} \cdot [\text{eIF1\_eIF3\_eIF5\_eIF2\_GTP\_Met-tRNA}] \cdot [40\text{S\_eIF1A}] \\
\frac{d[40\text{S}]}{dt} &= k_{1r33} \cdot [80\text{S\_eRF1\_eRF3\_GTP}] - k_{1r7} \cdot [40\text{S}] \cdot [\text{eIF1A}] \\
\frac{d[\text{eIF1A}]}{dt} &= k_{r18} \cdot [60\text{S}] \cdot [48\text{S\_Ded1\_eIF5B\_GTP}] \cdot \text{mRNA\_init\_free} \\
&\quad - k_{1r7} \cdot [40\text{S}] \cdot [\text{eIF1A}] \\
\frac{d[40\text{S\_eIF1A}]}{dt} &= k_{1r7} \cdot [40\text{S}] \cdot [\text{eIF1A}] \\
&\quad - k_{1r8} \cdot [\text{eIF1\_eIF3\_eIF5\_eIF2\_GTP\_Met-tRNA}] \cdot [40\text{S\_eIF1A}]
\end{aligned}$$

$$\begin{aligned}
\frac{d[43S]}{dt} &= k_{1r8} \cdot [eIF1\_eIF3\_eIF5\_eIF2\_GTP\_Met-tRNA] \cdot [40S\_eIF1A] \\
&\quad - k_{1r14} \cdot [43S] \cdot [eIF4E\_eIF4G\_mRNA\_Pab1\_eIF4A\_eIF4B] \\
\frac{d[eIF4E]}{dt} &= k_{r18} \cdot [60S] \cdot [48S\_Ded1\_eIF5B\_GTP] \cdot mRNA\_init\_free \\
&\quad - (k_{1r9} \cdot [eIF4E] \cdot [eIF4G] - k_{2r9} \cdot [eIF4E\_eIF4G]) \\
\frac{d[eIF4G]}{dt} &= k_{r18} \cdot [60S] \cdot [48S\_Ded1\_eIF5B\_GTP] \cdot mRNA\_init\_free \\
&\quad - (k_{1r9} \cdot [eIF4E] \cdot [eIF4G] - k_{2r9} \cdot [eIF4E\_eIF4G]) \\
\frac{d[eIF4E\_eIF4G]}{dt} &= k_{1r9} \cdot [eIF4E] \cdot [eIF4G] - k_{2r9} \cdot [eIF4E\_eIF4G] \\
&\quad - (k_{1r11} \cdot [eIF4E\_eIF4G] \cdot [mRNA\_Pab1] - k_{2r11} \cdot [eIF4E\_eIF4G\_mRNA\_Pab1]) \\
\frac{d[mRNA\_cap]}{dt} &= k_{r18} \cdot [60S] \cdot [48S\_Ded1\_eIF5B\_GTP] \cdot mRNA\_init\_free \\
&\quad - (k_{1r10} \cdot [mRNA\_cap] \cdot [Pab1] - k_{2r10} \cdot [mRNA\_Pab1]) \\
\frac{d[Pab1]}{dt} &= k_{r18} \cdot [60S] \cdot [48S\_Ded1\_eIF5B\_GTP] \cdot mRNA\_init\_free \\
&\quad - (k_{1r10} \cdot [mRNA\_cap] \cdot [Pab1] - k_{2r10} \cdot [mRNA\_Pab1]) \\
\frac{d[mRNA\_Pab1]}{dt} &= k_{1r10} \cdot [mRNA\_cap] \cdot [Pab1] - k_{2r10} \cdot [mRNA\_Pab1] \\
&\quad - (k_{1r11} \cdot [eIF4E\_eIF4G] \cdot [mRNA\_Pab1] - k_{2r11} \cdot [eIF4E\_eIF4G\_mRNA\_Pab1]) \\
\frac{d[eIF4E\_eIF4G\_mRNA\_Pab1]}{dt} &= k_{1r11} \cdot [eIF4E\_eIF4G] \cdot [mRNA\_Pab1] - k_{2r11} \cdot [eIF4E\_eIF4G\_mRNA\_Pab1] \\
&\quad - (k_{1r12} \cdot [eIF4A] \cdot [eIF4E\_eIF4G\_mRNA\_Pab1] \\
&\quad - k_{2r12} \cdot [eIF4A\_eIF4E\_eIF4G\_mRNA\_Pab1]) \\
\frac{d[eIF4A]}{dt} &= k_{r18} \cdot [60S] \cdot [48S\_Ded1\_eIF5B\_GTP] \cdot mRNA\_init\_free \\
&\quad - (k_{1r12} \cdot [eIF4A] \cdot [eIF4E\_eIF4G\_mRNA\_Pab1] \\
\frac{d[eIF4A\_eIF4E\_eIF4G\_mRNA\_Pab1]}{dt} &= k_{1r12} \cdot [eIF4A] \cdot [eIF4E\_eIF4G\_mRNA\_Pab1] \\
&\quad - k_{2r12} \cdot [eIF4A\_eIF4E\_eIF4G\_mRNA\_Pab1] \\
&\quad - (k_{1r13} \cdot [eIF4B] \cdot [eIF4A\_eIF4E\_eIF4G\_mRNA\_Pab1] \\
&\quad - k_{2r13} \cdot [eIF4E\_eIF4G\_mRNA\_Pab1\_eIF4A\_eIF4B]) \\
\frac{d[eIF4B]}{dt} &= k_{r18} \cdot [60S] \cdot [48S\_Ded1\_eIF5B\_GTP] \cdot mRNA\_init\_free \\
&\quad - (k_{1r13} \cdot [eIF4B] \cdot [eIF4A\_eIF4E\_eIF4G\_mRNA\_Pab1] \\
&\quad - k_{2r13} \cdot [eIF4E\_eIF4G\_mRNA\_Pab1\_eIF4A\_eIF4B]) \\
\frac{d[eIF4E\_eIF4G\_mRNA\_Pab1\_eIF4A\_eIF4B]}{dt} &= k_{1r13} \cdot [eIF4B] \cdot [eIF4A\_eIF4E\_eIF4G\_mRNA\_Pab1] \\
&\quad - k_{2r13} \cdot [eIF4E\_eIF4G\_mRNA\_Pab1\_eIF4A\_eIF4B]) \\
&\quad - k_{1r14} \cdot [43S] \cdot [eIF4E\_eIF4G\_mRNA\_Pab1\_eIF4A\_eIF4B] \\
\frac{d[48S]}{dt} &= k_{1r14} \cdot [43S] \cdot [eIF4E\_eIF4G\_mRNA\_Pab1\_eIF4A\_eIF4B] \\
&\quad - (k_{1r15} \cdot [48S] \cdot [Ded1] - k_{2r15} \cdot [48S\_Ded1]) \\
\frac{d[Ded1]}{dt} &= k_{r18} \cdot [60S] \cdot [48S\_Ded1\_eIF5B\_GTP] \cdot mRNA\_init\_free \\
&\quad - (k_{1r15} \cdot [48S] \cdot [Ded1] - k_{2r15} \cdot [48S\_Ded1]) \\
\frac{d[48S\_Ded1]}{dt} &= k_{1r15} \cdot [48S] \cdot [Ded1] - k_{2r15} \cdot [48S\_Ded1] \\
&\quad - (k_{1r17} \cdot [48S\_Ded1] \cdot [eIF5B\_GTP] - k_{2r17} \cdot [48S\_Ded1\_eIF5B\_GTP])
\end{aligned}$$

$$\begin{aligned}
\frac{d[\text{eIF5B\_GDP}]}{dt} &= k_{r18} \cdot [60\text{S}] \cdot [48\text{S\_Ded1\_eIF5B\_GTP}] \cdot \text{mRNA\_init\_free} \\
&\quad - (k_{1r16} \cdot [\text{eIF5B\_GDP}] - k_{2r16} \cdot [\text{eIF5B\_GTP}]) \\
\frac{d[\text{eIF5B\_GTP}]}{dt} &= k_{1r16} \cdot [\text{eIF5B\_GDP}] - k_{2r16} \cdot [\text{eIF5B\_GTP}] \\
&\quad - (k_{1r17} \cdot [48\text{S\_Ded1}] \cdot [\text{eIF5B\_GTP}] - k_{2r17} \cdot [48\text{S\_Ded1\_eIF5B\_GTP}]) \\
\frac{d[48\text{S\_Ded1\_eIF5B\_GTP}]}{dt} &= k_{1r17} \cdot [48\text{S\_Ded1}] \cdot [\text{eIF5B\_GTP}] - k_{2r17} \cdot [48\text{S\_Ded1\_eIF5B\_GTP}] \\
&\quad - k_{r18} \cdot [60\text{S}] \cdot [48\text{S\_Ded1\_eIF5B\_GTP}] \cdot \text{mRNA\_init\_free} \\
\frac{d[60\text{S}]}{dt} &= k_{1r33} \cdot [80\text{S\_eRF1\_eRF3\_GTP}] \\
&\quad - k_{r18} \cdot [60\text{S}] \cdot [48\text{S\_Ded1\_eIF5B\_GTP}] \cdot \text{mRNA\_init\_free} \\
\frac{d[\text{eEF1A\_GDP}]}{dt} &= k_{23f} \cdot [80\text{S\_aa-tRNA\_eEF1A\_GTP\_1}] \\
&\quad + k_{23f} \cdot [80\text{S\_aa-tRNA\_eEF1A\_GTP\_2}] \\
&\quad + k_{23f} \cdot [80\text{S\_aa-tRNA\_eEF1A\_GTP\_3}] \\
&\quad + k_{23f} \cdot [80\text{S\_aa-tRNA\_eEF1A\_GTP\_4}] \\
&\quad + k_{23f} \cdot [80\text{S\_aa-tRNA\_eEF1A\_GTP\_5}] \\
&\quad + k_{23f} \cdot [80\text{S\_aa-tRNA\_eEF1A\_GTP\_6}] \\
&\quad + k_{23f} \cdot [80\text{S\_aa-tRNA\_eEF1A\_GTP\_7}] \\
&\quad + k_{23f} \cdot [80\text{S\_aa-tRNA\_eEF1A\_GTP\_8}] \\
&\quad + k_{23f} \cdot [80\text{S\_aa-tRNA\_eEF1A\_GTP\_9}] \\
&\quad + k_{23f} \cdot [80\text{S\_aa-tRNA\_eEF1A\_GTP\_10}] \\
&\quad + k_{23f} \cdot [80\text{S\_aa-tRNA\_eEF1A\_GTP\_11}] \\
&\quad + k_{23f} \cdot [80\text{S\_aa-tRNA\_eEF1A\_GTP\_12}] \\
&\quad + k_{23f} \cdot [80\text{S\_aa-tRNA\_eEF1A\_GTP\_13}] \\
&\quad + k_{23f} \cdot [80\text{S\_aa-tRNA\_eEF1A\_GTP\_14}] \\
&\quad + k_{23f} \cdot [80\text{S\_aa-tRNA\_eEF1A\_GTP\_15}] \\
&\quad + k_{23f} \cdot [80\text{S\_aa-tRNA\_eEF1A\_GTP\_16}] \\
&\quad + k_{23f} \cdot [80\text{S\_aa-tRNA\_eEF1A\_GTP\_17}] \\
&\quad + k_{23f} \cdot [80\text{S\_aa-tRNA\_eEF1A\_GTP\_18}] \\
&\quad + k_{23f} \cdot [80\text{S\_aa-tRNA\_eEF1A\_GTP\_19}] \\
&\quad - (k_{1r19} \cdot [\text{eEF1A\_GDP}] \cdot [\text{eEF1B}] - k_{2r19} \cdot [\text{eEF1A\_GDP\_eEF1B}]) \\
\frac{d[\text{eEF1B}]}{dt} &= k_{1r20} \cdot [\text{eEF1A\_GDP\_eEF1B}] - k_{2r20} \cdot [\text{eEF1A\_GTP}] \cdot [\text{eEF1B}] \\
&\quad - (k_{1r19} \cdot [\text{eEF1A\_GDP}] \cdot [\text{eEF1B}] - k_{2r19} \cdot [\text{eEF1A\_GDP\_eEF1B}]) \\
\frac{d[\text{eEF1A\_GDP\_eEF1B}]}{dt} &= k_{1r19} \cdot [\text{eEF1A\_GDP}] \cdot [\text{eEF1B}] - k_{2r19} \cdot [\text{eEF1A\_GDP\_eEF1B}] \\
&\quad - (k_{1r20} \cdot [\text{eEF1A\_GDP\_eEF1B}] - k_{2r20} \cdot [\text{eEF1A\_GTP}] \cdot [\text{eEF1B}]) \\
\frac{d[\text{eEF1A\_GTP}]}{dt} &= k_{1r20} \cdot [\text{eEF1A\_GDP\_eEF1B}] - k_{2r20} \cdot [\text{eEF1A\_GTP}] \cdot [\text{eEF1B}] \\
&\quad - (k_{1r21} \cdot [\text{eEF1A\_GTP}] \cdot [\text{aa-tRNA}] - k_{2r21} \cdot [\text{aa-tRNA\_eEF1A\_GTP}])
\end{aligned}$$



$$\begin{aligned}
\frac{d[\text{eEF2\_GTP}]}{dt} = & k1_{r24} \cdot [\text{eEF2\_GDP}] - k2_{r24} \cdot [\text{eEF2\_GTP}] \\
& - (k25f \cdot [\text{eEF2\_GTP}] \cdot [\text{80S\_aa-tRNA\_14}] - k25b \cdot [\text{80S\_aa-tRNA\_eEF2\_GTP\_14}]) \\
& - (k25f \cdot [\text{eEF2\_GTP}] \cdot [\text{80S\_aa-tRNA\_15}] - k25b \cdot [\text{80S\_aa-tRNA\_eEF2\_GTP\_15}]) \\
& - (k25f \cdot [\text{eEF2\_GTP}] \cdot [\text{80S\_aa-tRNA\_16}] - k25b \cdot [\text{80S\_aa-tRNA\_eEF2\_GTP\_16}]) \\
& - (k25f \cdot [\text{eEF2\_GTP}] \cdot [\text{80S\_aa-tRNA\_17}] - k25b \cdot [\text{80S\_aa-tRNA\_eEF2\_GTP\_17}]) \\
& - (k25f \cdot [\text{eEF2\_GTP}] \cdot [\text{80S\_aa-tRNA\_18}] - k25b \cdot [\text{80S\_aa-tRNA\_eEF2\_GTP\_18}]) \\
& - (k25f \cdot [\text{eEF2\_GTP}] \cdot [\text{80S\_aa-tRNA\_19}] - k25b \cdot [\text{80S\_aa-tRNA\_eEF2\_GTP\_19}]) \\
& - (k25f \cdot [\text{eEF2\_GTP}] \cdot [\text{80S\_aa-tRNA\_1}] - k25b \cdot [\text{80S\_aa-tRNA\_eEF2\_GTP\_1}]) \\
& - (k25f \cdot [\text{eEF2\_GTP}] \cdot [\text{80S\_aa-tRNA\_2}] - k25b \cdot [\text{80S\_aa-tRNA\_eEF2\_GTP\_2}]) \\
& - (k25f \cdot [\text{eEF2\_GTP}] \cdot [\text{80S\_aa-tRNA\_3}] - k25b \cdot [\text{80S\_aa-tRNA\_eEF2\_GTP\_3}]) \\
& - (k25f \cdot [\text{eEF2\_GTP}] \cdot [\text{80S\_aa-tRNA\_4}] - k25b \cdot [\text{80S\_aa-tRNA\_eEF2\_GTP\_4}]) \\
& - (k25f \cdot [\text{eEF2\_GTP}] \cdot [\text{80S\_aa-tRNA\_5}] - k25b \cdot [\text{80S\_aa-tRNA\_eEF2\_GTP\_5}]) \\
& - (k25f \cdot [\text{eEF2\_GTP}] \cdot [\text{80S\_aa-tRNA\_6}] - k25b \cdot [\text{80S\_aa-tRNA\_eEF2\_GTP\_6}]) \\
& - (k25f \cdot [\text{eEF2\_GTP}] \cdot [\text{80S\_aa-tRNA\_7}] - k25b \cdot [\text{80S\_aa-tRNA\_eEF2\_GTP\_7}]) \\
& - (k25f \cdot [\text{eEF2\_GTP}] \cdot [\text{80S\_aa-tRNA\_8}] - k25b \cdot [\text{80S\_aa-tRNA\_eEF2\_GTP\_8}]) \\
& - (k25f \cdot [\text{eEF2\_GTP}] \cdot [\text{80S\_aa-tRNA\_9}] - k25b \cdot [\text{80S\_aa-tRNA\_eEF2\_GTP\_9}]) \\
& - (k25f \cdot [\text{eEF2\_GTP}] \cdot [\text{80S\_aa-tRNA\_10}] - k25b \cdot [\text{80S\_aa-tRNA\_eEF2\_GTP\_10}]) \\
& - (k25f \cdot [\text{eEF2\_GTP}] \cdot [\text{80S\_aa-tRNA\_11}] - k25b \cdot [\text{80S\_aa-tRNA\_eEF2\_GTP\_11}]) \\
& - (k25f \cdot [\text{eEF2\_GTP}] \cdot [\text{80S\_aa-tRNA\_12}] - k25b \cdot [\text{80S\_aa-tRNA\_eEF2\_GTP\_12}]) \\
& - (k25f \cdot [\text{eEF2\_GTP}] \cdot [\text{80S\_aa-tRNA\_13}] - k25b \cdot [\text{80S\_aa-tRNA\_eEF2\_GTP\_13}])
\end{aligned}$$

$$\begin{aligned}
\frac{d[\text{eEF3\_GDP}]}{dt} = & k29f \cdot [\text{80S\_tRNA\_eEF3\_GTP\_2}] \\
& + k29f \cdot [\text{80S\_tRNA\_eEF3\_GTP\_3}] \\
& + k29f \cdot [\text{80S\_tRNA\_eEF3\_GTP\_4}] \\
& + k29f \cdot [\text{80S\_tRNA\_eEF3\_GTP\_5}] \\
& + k29f \cdot [\text{80S\_tRNA\_eEF3\_GTP\_6}] \\
& + k29f \cdot [\text{80S\_tRNA\_eEF3\_GTP\_7}] \\
& + k29f \cdot [\text{80S\_tRNA\_eEF3\_GTP\_8}] \\
& + k29f \cdot [\text{80S\_tRNA\_eEF3\_GTP\_9}] \\
& + k29f \cdot [\text{80S\_tRNA\_eEF3\_GTP\_10}] \\
& + k29f \cdot [\text{80S\_tRNA\_eEF3\_GTP\_11}] \\
& + k29f \cdot [\text{80S\_tRNA\_eEF3\_GTP\_12}] \\
& + k29f \cdot [\text{80S\_tRNA\_eEF3\_GTP\_13}] \\
& + k29f \cdot [\text{80S\_tRNA\_eEF3\_GTP\_14}] \\
& + k29f \cdot [\text{80S\_tRNA\_eEF3\_GTP\_15}] \\
& + k29f \cdot [\text{80S\_tRNA\_eEF3\_GTP\_16}] \\
& + k29f \cdot [\text{80S\_tRNA\_eEF3\_GTP\_17}] \\
& + k29f \cdot [\text{80S\_tRNA\_eEF3\_GTP\_18}] \\
& + k29f \cdot [\text{80S\_tRNA\_eEF3\_GTP\_19}] \\
& + k29f \cdot [\text{80S\_tRNA\_eEF3\_GTP\_20}] \\
& - (k1_{r27} \cdot [\text{eEF3\_GDP}] - k2_{r27} \cdot [\text{eEF3\_GTP}])
\end{aligned}$$

$$\begin{aligned}
\frac{d[\text{eEF3\_GTP}]}{dt} &= k_{1r27} \cdot [\text{eEF3\_GDP}] - k_{2r27} \cdot [\text{eEF3\_GTP}] \\
&\quad - k_{28f} \cdot [\text{80S\_tRNA\_2}] \cdot [\text{eEF3\_GTP}] \\
&\quad - k_{28f} \cdot [\text{80S\_tRNA\_3}] \cdot [\text{eEF3\_GTP}] \\
&\quad - k_{28f} \cdot [\text{80S\_tRNA\_4}] \cdot [\text{eEF3\_GTP}] \\
&\quad - k_{28f} \cdot [\text{80S\_tRNA\_5}] \cdot [\text{eEF3\_GTP}] \\
&\quad - k_{28f} \cdot [\text{80S\_tRNA\_6}] \cdot [\text{eEF3\_GTP}] \\
&\quad - k_{28f} \cdot [\text{80S\_tRNA\_7}] \cdot [\text{eEF3\_GTP}] \\
&\quad - k_{28f} \cdot [\text{80S\_tRNA\_8}] \cdot [\text{eEF3\_GTP}] \\
&\quad - k_{28f} \cdot [\text{80S\_tRNA\_9}] \cdot [\text{eEF3\_GTP}] \\
&\quad - k_{28f} \cdot [\text{80S\_tRNA\_10}] \cdot [\text{eEF3\_GTP}] \\
&\quad - k_{28f} \cdot [\text{80S\_tRNA\_11}] \cdot [\text{eEF3\_GTP}] \\
&\quad - k_{28f} \cdot [\text{80S\_tRNA\_12}] \cdot [\text{eEF3\_GTP}] \\
&\quad - k_{28f} \cdot [\text{80S\_tRNA\_13}] \cdot [\text{eEF3\_GTP}] \\
&\quad - k_{28f} \cdot [\text{80S\_tRNA\_14}] \cdot [\text{eEF3\_GTP}] \\
&\quad - k_{28f} \cdot [\text{80S\_tRNA\_15}] \cdot [\text{eEF3\_GTP}] \\
&\quad - k_{28f} \cdot [\text{80S\_tRNA\_16}] \cdot [\text{eEF3\_GTP}] \\
&\quad - k_{28f} \cdot [\text{80S\_tRNA\_17}] \cdot [\text{eEF3\_GTP}] \\
&\quad - k_{28f} \cdot [\text{80S\_tRNA\_18}] \cdot [\text{eEF3\_GTP}] \\
&\quad - k_{28f} \cdot [\text{80S\_tRNA\_19}] \cdot [\text{eEF3\_GTP}] \\
&\quad - k_{28f} \cdot [\text{80S\_tRNA\_20}] \cdot [\text{eEF3\_GTP}] \\
\frac{d[\text{80S\_1}]}{dt} &= k_{r18} \cdot [\text{60S}] \cdot [\text{48S\_Ded1\_eIF5B\_GTP}] \cdot \text{mRNA\_init\_free} \\
&\quad - (k_{22f} \cdot [\text{aa-tRNA\_eEF1A\_GTP}] \cdot [\text{80S\_1}] - k_{22b} \cdot [\text{80S\_aa-tRNA\_eEF1A\_GTP\_1}]) \\
\frac{d[\text{80S\_aa-tRNA\_eEF1A\_GTP\_1}]}{dt} &= k_{22f} \cdot [\text{aa-tRNA\_eEF1A\_GTP}] \cdot [\text{80S\_1}] - k_{22b} \cdot [\text{80S\_aa-tRNA\_eEF1A\_GTP\_1}] \\
&\quad - k_{23f} \cdot [\text{80S\_aa-tRNA\_eEF1A\_GTP\_1}] \\
\frac{d[\text{80S\_aa-tRNA\_1}]}{dt} &= k_{23f} \cdot [\text{80S\_aa-tRNA\_eEF1A\_GTP\_1}] \\
&\quad - (k_{25f} \cdot [\text{eEF2\_GTP}] \cdot [\text{80S\_aa-tRNA\_1}] - k_{25b} \cdot [\text{80S\_aa-tRNA\_eEF2\_GTP\_1}]) \\
\frac{d[\text{80S\_aa-tRNA\_eEF2\_GTP\_1}]}{dt} &= k_{25f} \cdot [\text{eEF2\_GTP}] \cdot [\text{80S\_aa-tRNA\_1}] - k_{25b} \cdot [\text{80S\_aa-tRNA\_eEF2\_GTP\_1}] \\
&\quad - k_{26f} \cdot [\text{80S\_aa-tRNA\_eEF2\_GTP\_1}] \cdot \frac{\text{mRNA\_num1}}{\text{mRNA\_den1}} \\
\frac{d[\text{80S\_2}]}{dt} &= k_{29f} \cdot [\text{80S\_tRNA\_eEF3\_GTP\_2}] \\
&\quad - (k_{22f} \cdot [\text{aa-tRNA\_eEF1A\_GTP}] \cdot [\text{80S\_2}] - k_{22b} \cdot [\text{80S\_aa-tRNA\_eEF1A\_GTP\_2}]) \\
\frac{d[\text{80S\_aa-tRNA\_eEF1A\_GTP\_2}]}{dt} &= k_{22f} \cdot [\text{aa-tRNA\_eEF1A\_GTP}] \cdot [\text{80S\_2}] - k_{22b} \cdot [\text{80S\_aa-tRNA\_eEF1A\_GTP\_2}] \\
&\quad - k_{23f} \cdot [\text{80S\_aa-tRNA\_eEF1A\_GTP\_2}] \\
\frac{d[\text{80S\_aa-tRNA\_2}]}{dt} &= k_{23f} \cdot [\text{80S\_aa-tRNA\_eEF1A\_GTP\_2}] \\
&\quad - (k_{25f} \cdot [\text{eEF2\_GTP}] \cdot [\text{80S\_aa-tRNA\_2}] - k_{25b} \cdot [\text{80S\_aa-tRNA\_eEF2\_GTP\_2}]) \\
\frac{d[\text{80S\_aa-tRNA\_eEF2\_GTP\_2}]}{dt} &= k_{25f} \cdot [\text{eEF2\_GTP}] \cdot [\text{80S\_aa-tRNA\_2}] - k_{25b} \cdot [\text{80S\_aa-tRNA\_eEF2\_GTP\_2}] \\
&\quad - k_{26f} \cdot [\text{80S\_aa-tRNA\_eEF2\_GTP\_2}] \cdot \frac{\text{mRNA\_num2}}{\text{mRNA\_den2}} \\
\frac{d[\text{80S\_tRNA\_2}]}{dt} &= k_{26f} \cdot [\text{80S\_aa-tRNA\_eEF2\_GTP\_1}] \cdot \frac{\text{mRNA\_num1}}{\text{mRNA\_den1}} \\
&\quad - k_{28f} \cdot [\text{80S\_tRNA\_2}] \cdot [\text{eEF3\_GTP}]
\end{aligned}$$

$$\begin{aligned}
\frac{d[80S\_tRNA\_eEF3\_GTP\_2]}{dt} &= k28f \cdot [80S\_tRNA\_2] \cdot [eEF3\_GTP] - k29f \cdot [80S\_tRNA\_eEF3\_GTP\_2] \\
\frac{d[80S\_3]}{dt} &= k29f \cdot [80S\_tRNA\_eEF3\_GTP\_3] \\
&\quad - (k22f \cdot [aa\_tRNA\_eEF1A\_GTP] \cdot [80S\_3] - k22b \cdot [80S\_aa\_tRNA\_eEF1A\_GTP\_3]) \\
\frac{d[80S\_aa\_tRNA\_eEF1A\_GTP\_3]}{dt} &= k22f \cdot [aa\_tRNA\_eEF1A\_GTP] \cdot [80S\_3] - k22b \cdot [80S\_aa\_tRNA\_eEF1A\_GTP\_3] \\
&\quad - k23f \cdot [80S\_aa\_tRNA\_eEF1A\_GTP\_3] \\
\frac{d[80S\_aa\_tRNA\_3]}{dt} &= k23f \cdot [80S\_aa\_tRNA\_eEF1A\_GTP\_3] \\
&\quad - (k25f \cdot [eEF2\_GTP] \cdot [80S\_aa\_tRNA\_3] - k25b \cdot [80S\_aa\_tRNA\_eEF2\_GTP\_3]) \\
\frac{d[80S\_aa\_tRNA\_eEF2\_GTP\_3]}{dt} &= k25f \cdot [eEF2\_GTP] \cdot [80S\_aa\_tRNA\_3] - k25b \cdot [80S\_aa\_tRNA\_eEF2\_GTP\_3] \\
&\quad + k26f \cdot [80S\_aa\_tRNA\_eEF2\_GTP\_3] \cdot \frac{mRNA\_num3}{mRNA\_den3} \\
\frac{d[80S\_tRNA\_3]}{dt} &= k26f \cdot [80S\_aa\_tRNA\_eEF2\_GTP\_2] \cdot \frac{mRNA\_num2}{mRNA\_den2} \\
&\quad - k28f \cdot [80S\_tRNA\_3] \cdot [eEF3\_GTP] \\
\frac{d[80S\_tRNA\_eEF3\_GTP\_3]}{dt} &= k28f \cdot [80S\_tRNA\_3] \cdot [eEF3\_GTP] - k29f \cdot [80S\_tRNA\_eEF3\_GTP\_3] \\
\frac{d[80S\_4]}{dt} &= k29f \cdot [80S\_tRNA\_eEF3\_GTP\_4] \\
&\quad - (k22f \cdot [aa\_tRNA\_eEF1A\_GTP] \cdot [80S\_4] - k22b \cdot [80S\_aa\_tRNA\_eEF1A\_GTP\_4]) \\
\frac{d[80S\_aa\_tRNA\_eEF1A\_GTP\_4]}{dt} &= k22f \cdot [aa\_tRNA\_eEF1A\_GTP] \cdot [80S\_4] - k22b \cdot [80S\_aa\_tRNA\_eEF1A\_GTP\_4] \\
&\quad - (k23f \cdot [80S\_aa\_tRNA\_eEF1A\_GTP\_4]) \\
\frac{d[80S\_aa\_tRNA\_4]}{dt} &= k23f \cdot [80S\_aa\_tRNA\_eEF1A\_GTP\_4] \\
&\quad - (k25f \cdot [eEF2\_GTP] \cdot [80S\_aa\_tRNA\_4] - k25b \cdot [80S\_aa\_tRNA\_eEF2\_GTP\_4]) \\
\frac{d[80S\_aa\_tRNA\_eEF2\_GTP\_4]}{dt} &= k25f \cdot [eEF2\_GTP] \cdot [80S\_aa\_tRNA\_4] - k25b \cdot [80S\_aa\_tRNA\_eEF2\_GTP\_4] \\
&\quad - k26f \cdot [80S\_aa\_tRNA\_eEF2\_GTP\_4] \cdot \frac{mRNA\_num4}{mRNA\_den4} \\
\frac{d[80S\_tRNA\_4]}{dt} &= k26f \cdot [80S\_aa\_tRNA\_eEF2\_GTP\_3] \cdot \frac{mRNA\_num3}{mRNA\_den3} \\
&\quad - k28f \cdot [80S\_tRNA\_4] \cdot [eEF3\_GTP] \\
\frac{d[80S\_tRNA\_eEF3\_GTP\_4]}{dt} &= k28f \cdot [80S\_tRNA\_4] \cdot [eEF3\_GTP] - k29f \cdot [80S\_tRNA\_eEF3\_GTP\_4] \\
\frac{d[80S\_5]}{dt} &= k29f \cdot [80S\_tRNA\_eEF3\_GTP\_5] \\
&\quad - (k22f \cdot [aa\_tRNA\_eEF1A\_GTP] \cdot [80S\_5] - k22b \cdot [80S\_aa\_tRNA\_eEF1A\_GTP\_5]) \\
\frac{d[80S\_aa\_tRNA\_eEF1A\_GTP\_5]}{dt} &= k22f \cdot [aa\_tRNA\_eEF1A\_GTP] \cdot [80S\_5] - k22b \cdot [80S\_aa\_tRNA\_eEF1A\_GTP\_5] \\
&\quad - k23f \cdot [80S\_aa\_tRNA\_eEF1A\_GTP\_5] \\
\frac{d[80S\_aa\_tRNA\_5]}{dt} &= k23f \cdot [80S\_aa\_tRNA\_eEF1A\_GTP\_5] \\
&\quad - (k25f \cdot [eEF2\_GTP] \cdot [80S\_aa\_tRNA\_5] - k25b \cdot [80S\_aa\_tRNA\_eEF2\_GTP\_5]) \\
\frac{d[80S\_aa\_tRNA\_eEF2\_GTP\_5]}{dt} &= k25f \cdot [eEF2\_GTP] \cdot [80S\_aa\_tRNA\_5] - k25b \cdot [80S\_aa\_tRNA\_eEF2\_GTP\_5] \\
&\quad - k26f \cdot [80S\_aa\_tRNA\_eEF2\_GTP\_5] \cdot \frac{mRNA\_num5}{mRNA\_den5}
\end{aligned}$$



$$\begin{aligned} \frac{d[80S\_tRNA\_5]}{dt} &= k26f \cdot [80S\_aa-tRNA\_eEF2\_GTP\_4] \cdot \frac{mRNA\_num4}{mRNA\_den4} \\ &\quad - k28f \cdot [80S\_tRNA\_5] \cdot [eEF3\_GTP] \\ \frac{d[80S\_tRNA\_eEF3\_GTP\_5]}{dt} &= k28f \cdot [80S\_tRNA\_5] \cdot [eEF3\_GTP] - k29f \cdot [80S\_tRNA\_eEF3\_GTP\_5] \\ \frac{d[80S\_6]}{dt} &= k29f \cdot [80S\_tRNA\_eEF3\_GTP\_6] \\ &\quad - (k22f \cdot [aa-tRNA\_eEF1A\_GTP] \cdot [80S\_6] - k22b \cdot [80S\_aa-tRNA\_eEF1A\_GTP\_6]) \\ \frac{d[80S\_aa-tRNA\_eEF1A\_GTP\_6]}{dt} &= k22f \cdot [aa-tRNA\_eEF1A\_GTP] \cdot [80S\_6] - k22b \cdot [80S\_aa-tRNA\_eEF1A\_GTP\_6] \\ &\quad - k23f \cdot [80S\_aa-tRNA\_eEF1A\_GTP\_6] \\ \frac{d[80S\_aa-tRNA\_6]}{dt} &= k23f \cdot [80S\_aa-tRNA\_eEF1A\_GTP\_6] \\ &\quad - (k25f \cdot [eEF2\_GTP] \cdot [80S\_aa-tRNA\_6] - k25b \cdot [80S\_aa-tRNA\_eEF2\_GTP\_6]) \\ \frac{d[80S\_aa-tRNA\_eEF2\_GTP\_6]}{dt} &= k25f \cdot [eEF2\_GTP] \cdot [80S\_aa-tRNA\_6] - k25b \cdot [80S\_aa-tRNA\_eEF2\_GTP\_6] \\ &\quad - k26f \cdot [80S\_aa-tRNA\_eEF2\_GTP\_6] \\ \frac{d[80S\_tRNA\_6]}{dt} &= k26f \cdot [80S\_aa-tRNA\_eEF2\_GTP\_5] \cdot \frac{mRNA\_num5}{mRNA\_den5} \\ &\quad - k28f \cdot [80S\_tRNA\_6] \cdot [eEF3\_GTP] \\ \frac{d[80S\_tRNA\_eEF3\_GTP\_6]}{dt} &= k28f \cdot [80S\_tRNA\_6] \cdot [eEF3\_GTP] \\ &\quad - (k29f \cdot [80S\_tRNA\_eEF3\_GTP\_6]) \\ \frac{d[80S\_7]}{dt} &= k29f \cdot [80S\_tRNA\_eEF3\_GTP\_7] \\ &\quad - (k22f \cdot [aa-tRNA\_eEF1A\_GTP] \cdot [80S\_7] - k22b \cdot [80S\_aa-tRNA\_eEF1A\_GTP\_7]) \\ \frac{d[80S\_aa-tRNA\_eEF1A\_GTP\_7]}{dt} &= k22f \cdot [aa-tRNA\_eEF1A\_GTP] \cdot [80S\_7] - k22b \cdot [80S\_aa-tRNA\_eEF1A\_GTP\_7] \\ &\quad - k23f \cdot [80S\_aa-tRNA\_eEF1A\_GTP\_7] \\ \frac{d[80S\_aa-tRNA\_7]}{dt} &= k23f \cdot [80S\_aa-tRNA\_eEF1A\_GTP\_7] \\ &\quad - (k25f \cdot [eEF2\_GTP] \cdot [80S\_aa-tRNA\_7] - k25b \cdot [80S\_aa-tRNA\_eEF2\_GTP\_7]) \\ \frac{d[80S\_aa-tRNA\_eEF2\_GTP\_7]}{dt} &= k25f \cdot [eEF2\_GTP] \cdot [80S\_aa-tRNA\_7] - k25b \cdot [80S\_aa-tRNA\_eEF2\_GTP\_7] \\ &\quad - k26f \cdot [80S\_aa-tRNA\_eEF2\_GTP\_7] \\ \frac{d[80S\_tRNA\_7]}{dt} &= k26f \cdot [80S\_aa-tRNA\_eEF2\_GTP\_6] - k28f \cdot [80S\_tRNA\_7] \cdot [eEF3\_GTP] \\ \frac{d[80S\_tRNA\_eEF3\_GTP\_7]}{dt} &= k28f \cdot [80S\_tRNA\_7] \cdot [eEF3\_GTP] - k29f \cdot [80S\_tRNA\_eEF3\_GTP\_7] \\ \frac{d[80S\_8]}{dt} &= k29f \cdot [80S\_tRNA\_eEF3\_GTP\_8] \\ &\quad - (k22f \cdot [aa-tRNA\_eEF1A\_GTP] \cdot [80S\_8] - k22b \cdot [80S\_aa-tRNA\_eEF1A\_GTP\_8]) \\ \frac{d[80S\_aa-tRNA\_eEF1A\_GTP\_8]}{dt} &= k22f \cdot [aa-tRNA\_eEF1A\_GTP] \cdot [80S\_8] - k22b \cdot [80S\_aa-tRNA\_eEF1A\_GTP\_8] \\ &\quad - k23f \cdot [80S\_aa-tRNA\_eEF1A\_GTP\_8] \\ \frac{d[80S\_aa-tRNA\_8]}{dt} &= k23f \cdot [80S\_aa-tRNA\_eEF1A\_GTP\_8] \\ &\quad - (k25f \cdot [eEF2\_GTP] \cdot [80S\_aa-tRNA\_8] - k25b \cdot [80S\_aa-tRNA\_eEF2\_GTP\_8]) \\ \frac{d[80S\_aa-tRNA\_eEF2\_GTP\_8]}{dt} &= k25f \cdot [eEF2\_GTP] \cdot [80S\_aa-tRNA\_8] - k25b \cdot [80S\_aa-tRNA\_eEF2\_GTP\_8] \\ &\quad - k26f \cdot [80S\_aa-tRNA\_eEF2\_GTP\_8] \end{aligned}$$

$$\begin{aligned}
\frac{d[80S\_tRNA\_8]}{dt} &= k26f \cdot [80S\_aa-tRNA\_eEF2\_GTP\_7] - k28f \cdot [80S\_tRNA\_8] \cdot [eEF3\_GTP] \\
\frac{d[80S\_tRNA\_eEF3\_GTP\_8]}{dt} &= k28f \cdot [80S\_tRNA\_8] \cdot [eEF3\_GTP] - k29f \cdot [80S\_tRNA\_eEF3\_GTP\_8] \\
\frac{d[80S\_9]}{dt} &= k29f \cdot [80S\_tRNA\_eEF3\_GTP\_9] \\
&\quad - (k22f \cdot [aa-tRNA\_eEF1A\_GTP] \cdot [80S\_9] - k22b \cdot [80S\_aa-tRNA\_eEF1A\_GTP\_9]) \\
\frac{d[80S\_aa-tRNA\_eEF1A\_GTP\_9]}{dt} &= k22f \cdot [aa-tRNA\_eEF1A\_GTP] \cdot [80S\_9] - k22b \cdot [80S\_aa-tRNA\_eEF1A\_GTP\_9] \\
&\quad - k23f \cdot [80S\_aa-tRNA\_eEF1A\_GTP\_9] \\
\frac{d[80S\_aa-tRNA\_9]}{dt} &= k23f \cdot [80S\_aa-tRNA\_eEF1A\_GTP\_9] \\
&\quad - (k25f \cdot [eEF2\_GTP] \cdot [80S\_aa-tRNA\_9] - k25b \cdot [80S\_aa-tRNA\_eEF2\_GTP\_9]) \\
\frac{d[80S\_aa-tRNA\_eEF2\_GTP\_9]}{dt} &= k25f \cdot [eEF2\_GTP] \cdot [80S\_aa-tRNA\_9] - k25b \cdot [80S\_aa-tRNA\_eEF2\_GTP\_9] \\
&\quad - k26f \cdot [80S\_aa-tRNA\_eEF2\_GTP\_9] \\
\frac{d[80S\_tRNA\_9]}{dt} &= k26f \cdot [80S\_aa-tRNA\_eEF2\_GTP\_8] - k28f \cdot [80S\_tRNA\_9] \cdot [eEF3\_GTP] \\
\frac{d[80S\_tRNA\_eEF3\_GTP\_9]}{dt} &= k28f \cdot [80S\_tRNA\_9] \cdot [eEF3\_GTP] - k29f \cdot [80S\_tRNA\_eEF3\_GTP\_9] \\
\frac{d[80S\_10]}{dt} &= k29f \cdot [80S\_tRNA\_eEF3\_GTP\_10] \\
&\quad - (k22f \cdot [aa-tRNA\_eEF1A\_GTP] \cdot [80S\_10] - k22b \cdot [80S\_aa-tRNA\_eEF1A\_GTP\_10]) \\
\frac{d[80S\_aa-tRNA\_eEF1A\_GTP\_10]}{dt} &= k22f \cdot [aa-tRNA\_eEF1A\_GTP] \cdot [80S\_10] - k22b \cdot [80S\_aa-tRNA\_eEF1A\_GTP\_10] \\
&\quad - k23f \cdot [80S\_aa-tRNA\_eEF1A\_GTP\_10] \\
\frac{d[80S\_aa-tRNA\_10]}{dt} &= k23f \cdot [80S\_aa-tRNA\_eEF1A\_GTP\_10] \\
&\quad - (k25f \cdot [eEF2\_GTP] \cdot [80S\_aa-tRNA\_10] - k25b \cdot [80S\_aa-tRNA\_eEF2\_GTP\_10]) \\
\frac{d[80S\_aa-tRNA\_eEF2\_GTP\_10]}{dt} &= k25f \cdot [eEF2\_GTP] \cdot [80S\_aa-tRNA\_10] - k25b \cdot [80S\_aa-tRNA\_eEF2\_GTP\_10] \\
&\quad - k26f \cdot [80S\_aa-tRNA\_eEF2\_GTP\_10] \\
\frac{d[80S\_tRNA\_10]}{dt} &= k26f \cdot [80S\_aa-tRNA\_eEF2\_GTP\_9] - k28f \cdot [80S\_tRNA\_10] \cdot [eEF3\_GTP] \\
\frac{d[80S\_tRNA\_eEF3\_GTP\_10]}{dt} &= k28f \cdot [80S\_tRNA\_10] \cdot [eEF3\_GTP] - k29f \cdot [80S\_tRNA\_eEF3\_GTP\_10] \\
\frac{d[80S\_11]}{dt} &= k29f \cdot [80S\_tRNA\_eEF3\_GTP\_11] \\
&\quad - (k22f \cdot [aa-tRNA\_eEF1A\_GTP] \cdot [80S\_11] - k22b \cdot [80S\_aa-tRNA\_eEF1A\_GTP\_11]) \\
\frac{d[80S\_aa-tRNA\_eEF1A\_GTP\_11]}{dt} &= k22f \cdot [aa-tRNA\_eEF1A\_GTP] \cdot [80S\_11] - k22b \cdot [80S\_aa-tRNA\_eEF1A\_GTP\_11] \\
&\quad - k23f \cdot [80S\_aa-tRNA\_eEF1A\_GTP\_11] \\
\frac{d[80S\_aa-tRNA\_11]}{dt} &= k23f \cdot [80S\_aa-tRNA\_eEF1A\_GTP\_11] \\
&\quad - (k25f \cdot [eEF2\_GTP] \cdot [80S\_aa-tRNA\_11] - k25b \cdot [80S\_aa-tRNA\_eEF2\_GTP\_11]) \\
\frac{d[80S\_aa-tRNA\_eEF2\_GTP\_11]}{dt} &= k25f \cdot [eEF2\_GTP] \cdot [80S\_aa-tRNA\_11] - k25b \cdot [80S\_aa-tRNA\_eEF2\_GTP\_11] \\
&\quad - k26f \cdot [80S\_aa-tRNA\_eEF2\_GTP\_11] \\
\frac{d[80S\_tRNA\_11]}{dt} &= k26f \cdot [80S\_aa-tRNA\_eEF2\_GTP\_10] - k28f \cdot [80S\_tRNA\_11] \cdot [eEF3\_GTP]
\end{aligned}$$

$$\begin{aligned}
\frac{d[80S\_tRNA\_eEF3\_GTP\_11]}{dt} &= k28f \cdot [80S\_tRNA\_11] \cdot [eEF3\_GTP] - k29f \cdot [80S\_tRNA\_eEF3\_GTP\_11] \\
\frac{d[80S\_12]}{dt} &= k29f \cdot [80S\_tRNA\_eEF3\_GTP\_12] \\
&\quad - (k22f \cdot [aa\_tRNA\_eEF1A\_GTP] \cdot [80S\_12] - k22b \cdot [80S\_aa\_tRNA\_eEF1A\_GTP\_12]) \\
\frac{d[80S\_aa\_tRNA\_eEF1A\_GTP\_12]}{dt} &= k22f \cdot [aa\_tRNA\_eEF1A\_GTP] \cdot [80S\_12] - k22b \cdot [80S\_aa\_tRNA\_eEF1A\_GTP\_12] \\
&\quad - k23f \cdot [80S\_aa\_tRNA\_eEF1A\_GTP\_12] \\
\frac{d[80S\_aa\_tRNA\_12]}{dt} &= k23f \cdot [80S\_aa\_tRNA\_eEF1A\_GTP\_12] \\
&\quad - (k25f \cdot [eEF2\_GTP] \cdot [80S\_aa\_tRNA\_12] - k25b \cdot [80S\_aa\_tRNA\_eEF2\_GTP\_12]) \\
\frac{d[80S\_aa\_tRNA\_eEF2\_GTP\_12]}{dt} &= k25f \cdot [eEF2\_GTP] \cdot [80S\_aa\_tRNA\_12] - k25b \cdot [80S\_aa\_tRNA\_eEF2\_GTP\_12] \\
&\quad - k26f \cdot [80S\_aa\_tRNA\_eEF2\_GTP\_12] \\
\frac{d[80S\_tRNA\_12]}{dt} &= k26f \cdot [80S\_aa\_tRNA\_eEF2\_GTP\_11] - k28f \cdot [80S\_tRNA\_12] \cdot [eEF3\_GTP] \\
\frac{d[80S\_tRNA\_eEF3\_GTP\_12]}{dt} &= k28f \cdot [80S\_tRNA\_12] \cdot [eEF3\_GTP] - k29f \cdot [80S\_tRNA\_eEF3\_GTP\_12] \\
\frac{d[80S\_13]}{dt} &= k29f \cdot [80S\_tRNA\_eEF3\_GTP\_13] \\
&\quad - (k22f \cdot [aa\_tRNA\_eEF1A\_GTP] \cdot [80S\_13] - k22b \cdot [80S\_aa\_tRNA\_eEF1A\_GTP\_13]) \\
\frac{d[80S\_aa\_tRNA\_eEF1A\_GTP\_13]}{dt} &= k22f \cdot [aa\_tRNA\_eEF1A\_GTP] \cdot [80S\_13] - k22b \cdot [80S\_aa\_tRNA\_eEF1A\_GTP\_13] \\
&\quad - k23f \cdot [80S\_aa\_tRNA\_eEF1A\_GTP\_13] \\
\frac{d[80S\_aa\_tRNA\_13]}{dt} &= k23f \cdot [80S\_aa\_tRNA\_eEF1A\_GTP\_13] \\
&\quad - (k25f \cdot [eEF2\_GTP] \cdot [80S\_aa\_tRNA\_13] - k25b \cdot [80S\_aa\_tRNA\_eEF2\_GTP\_13]) \\
\frac{d[80S\_aa\_tRNA\_eEF2\_GTP\_13]}{dt} &= k25f \cdot [eEF2\_GTP] \cdot [80S\_aa\_tRNA\_13] - k25b \cdot [80S\_aa\_tRNA\_eEF2\_GTP\_13] \\
&\quad - k26f \cdot [80S\_aa\_tRNA\_eEF2\_GTP\_13] \\
\frac{d[80S\_tRNA\_13]}{dt} &= k26f \cdot [80S\_aa\_tRNA\_eEF2\_GTP\_12] - k28f \cdot [80S\_tRNA\_13] \cdot [eEF3\_GTP] \\
\frac{d[80S\_tRNA\_eEF3\_GTP\_13]}{dt} &= k28f \cdot [80S\_tRNA\_13] \cdot [eEF3\_GTP] - k29f \cdot [80S\_tRNA\_eEF3\_GTP\_13] \\
\frac{d[80S\_14]}{dt} &= k29f \cdot [80S\_tRNA\_eEF3\_GTP\_14] \\
&\quad - (k22f \cdot [aa\_tRNA\_eEF1A\_GTP] \cdot [80S\_14] - k22b \cdot [80S\_aa\_tRNA\_eEF1A\_GTP\_14]) \\
\frac{d[80S\_aa\_tRNA\_eEF1A\_GTP\_14]}{dt} &= k22f \cdot [aa\_tRNA\_eEF1A\_GTP] \cdot [80S\_14] - k22b \cdot [80S\_aa\_tRNA\_eEF1A\_GTP\_14] \\
&\quad - k23f \cdot [80S\_aa\_tRNA\_eEF1A\_GTP\_14] \\
\frac{d[80S\_aa\_tRNA\_14]}{dt} &= k23f \cdot [80S\_aa\_tRNA\_eEF1A\_GTP\_14] \\
&\quad - (k25f \cdot [eEF2\_GTP] \cdot [80S\_aa\_tRNA\_14] - k25b \cdot [80S\_aa\_tRNA\_eEF2\_GTP\_14]) \\
\frac{d[80S\_aa\_tRNA\_eEF2\_GTP\_14]}{dt} &= k25f \cdot [eEF2\_GTP] \cdot [80S\_aa\_tRNA\_14] - k25b \cdot [80S\_aa\_tRNA\_eEF2\_GTP\_14] \\
&\quad - k26f \cdot [80S\_aa\_tRNA\_eEF2\_GTP\_14] \\
\frac{d[80S\_tRNA\_14]}{dt} &= k26f \cdot [80S\_aa\_tRNA\_eEF2\_GTP\_13] - k28f \cdot [80S\_tRNA\_14] \cdot [eEF3\_GTP] \\
\frac{d[80S\_tRNA\_eEF3\_GTP\_14]}{dt} &= k28f \cdot [80S\_tRNA\_14] \cdot [eEF3\_GTP] - k29f \cdot [80S\_tRNA\_eEF3\_GTP\_14]
\end{aligned}$$

$$\begin{aligned}
\frac{d[80S_{15}]}{dt} &= k_{29f} \cdot [80S\_tRNA\_eEF3\_GTP_{15}] \\
&\quad - (k_{22f} \cdot [aa-tRNA\_eEF1A\_GTP] \cdot [80S_{15}] - k_{22b} \cdot [80S\_aa-tRNA\_eEF1A\_GTP_{15}]) \\
\frac{d[80S\_aa-tRNA\_eEF1A\_GTP_{15}]}{dt} &= k_{22f} \cdot [aa-tRNA\_eEF1A\_GTP] \cdot [80S_{15}] - k_{22b} \cdot [80S\_aa-tRNA\_eEF1A\_GTP_{15}] \\
&\quad - k_{23f} \cdot [80S\_aa-tRNA\_eEF1A\_GTP_{15}] \\
\frac{d[80S\_aa-tRNA_{15}]}{dt} &= k_{23f} \cdot [80S\_aa-tRNA\_eEF1A\_GTP_{15}] \\
&\quad - (k_{25f} \cdot [eEF2\_GTP] \cdot [80S\_aa-tRNA_{15}] - k_{25b} \cdot [80S\_aa-tRNA\_eEF2\_GTP_{15}]) \\
\frac{d[80S\_aa-tRNA\_eEF2\_GTP_{15}]}{dt} &= k_{25f} \cdot [eEF2\_GTP] \cdot [80S\_aa-tRNA_{15}] - k_{25b} \cdot [80S\_aa-tRNA\_eEF2\_GTP_{15}] \\
&\quad - k_{26f} \cdot [80S\_aa-tRNA\_eEF2\_GTP_{15}] \\
\frac{d[80S\_tRNA_{15}]}{dt} &= k_{26f} \cdot [80S\_aa-tRNA\_eEF2\_GTP_{14}] - k_{28f} \cdot [80S\_tRNA_{15}] \cdot [eEF3\_GTP] \\
\frac{d[80S\_tRNA\_eEF3\_GTP_{15}]}{dt} &= k_{28f} \cdot [80S\_tRNA_{15}] \cdot [eEF3\_GTP] - k_{29f} \cdot [80S\_tRNA\_eEF3\_GTP_{15}] \\
\frac{d[80S_{16}]}{dt} &= k_{29f} \cdot [80S\_tRNA\_eEF3\_GTP_{16}] \\
&\quad - (k_{22f} \cdot [aa-tRNA\_eEF1A\_GTP] \cdot [80S_{16}] - k_{22b} \cdot [80S\_aa-tRNA\_eEF1A\_GTP_{16}]) \\
\frac{d[80S\_aa-tRNA\_eEF1A\_GTP_{16}]}{dt} &= k_{22f} \cdot [aa-tRNA\_eEF1A\_GTP] \cdot [80S_{16}] - k_{22b} \cdot [80S\_aa-tRNA\_eEF1A\_GTP_{16}] \\
&\quad - k_{23f} \cdot [80S\_aa-tRNA\_eEF1A\_GTP_{16}] \\
\frac{d[80S\_aa-tRNA_{16}]}{dt} &= k_{23f} \cdot [80S\_aa-tRNA\_eEF1A\_GTP_{16}] \\
&\quad - (k_{25f} \cdot [eEF2\_GTP] \cdot [80S\_aa-tRNA_{16}] - k_{25b} \cdot [80S\_aa-tRNA\_eEF2\_GTP_{16}]) \\
\frac{d[80S\_aa-tRNA\_eEF2\_GTP_{16}]}{dt} &= k_{25f} \cdot [eEF2\_GTP] \cdot [80S\_aa-tRNA_{16}] - k_{25b} \cdot [80S\_aa-tRNA\_eEF2\_GTP_{16}] \\
&\quad - k_{26f} \cdot [80S\_aa-tRNA\_eEF2\_GTP_{16}] \\
\frac{d[80S\_tRNA_{16}]}{dt} &= k_{26f} \cdot [80S\_aa-tRNA\_eEF2\_GTP_{15}] - k_{28f} \cdot [80S\_tRNA_{16}] \cdot [eEF3\_GTP] \\
\frac{d[80S\_tRNA\_eEF3\_GTP_{16}]}{dt} &= k_{28f} \cdot [80S\_tRNA_{16}] \cdot [eEF3\_GTP] - k_{29f} \cdot [80S\_tRNA\_eEF3\_GTP_{16}] \\
\frac{d[80S_{17}]}{dt} &= k_{29f} \cdot [80S\_tRNA\_eEF3\_GTP_{17}] \\
&\quad - (k_{22f} \cdot [aa-tRNA\_eEF1A\_GTP] \cdot [80S_{17}] - k_{22b} \cdot [80S\_aa-tRNA\_eEF1A\_GTP_{17}]) \\
\frac{d[80S\_aa-tRNA\_eEF1A\_GTP_{17}]}{dt} &= k_{22f} \cdot [aa-tRNA\_eEF1A\_GTP] \cdot [80S_{17}] - k_{22b} \cdot [80S\_aa-tRNA\_eEF1A\_GTP_{17}] \\
&\quad - k_{23f} \cdot [80S\_aa-tRNA\_eEF1A\_GTP_{17}] \\
\frac{d[80S\_aa-tRNA_{17}]}{dt} &= k_{23f} \cdot [80S\_aa-tRNA\_eEF1A\_GTP_{17}] \\
&\quad - (k_{25f} \cdot [eEF2\_GTP] \cdot [80S\_aa-tRNA_{17}] - k_{25b} \cdot [80S\_aa-tRNA\_eEF2\_GTP_{17}]) \\
\frac{d[80S\_aa-tRNA\_eEF2\_GTP_{17}]}{dt} &= k_{25f} \cdot [eEF2\_GTP] \cdot [80S\_aa-tRNA_{17}] - k_{25b} \cdot [80S\_aa-tRNA\_eEF2\_GTP_{17}] \\
&\quad - k_{26f} \cdot [80S\_aa-tRNA\_eEF2\_GTP_{17}] \\
\frac{d[80S\_tRNA_{17}]}{dt} &= k_{26f} \cdot [80S\_aa-tRNA\_eEF2\_GTP_{16}] - k_{28f} \cdot [80S\_tRNA_{17}] \cdot [eEF3\_GTP] \\
\frac{d[80S\_tRNA\_eEF3\_GTP_{17}]}{dt} &= k_{28f} \cdot [80S\_tRNA_{17}] \cdot [eEF3\_GTP] - k_{29f} \cdot [80S\_tRNA\_eEF3\_GTP_{17}] \\
\frac{d[80S_{18}]}{dt} &= k_{29f} \cdot [80S\_tRNA\_eEF3\_GTP_{18}] \\
&\quad - (k_{22f} \cdot [aa-tRNA\_eEF1A\_GTP] \cdot [80S_{18}] - k_{22b} \cdot [80S\_aa-tRNA\_eEF1A\_GTP_{18}])
\end{aligned}$$

$$\begin{aligned}
\frac{d[80S\_aa-tRNA\_eEF1A\_GTP\_18]}{dt} &= k22f \cdot [aa-tRNA\_eEF1A\_GTP] \cdot [80S\_18] - k22b \cdot [80S\_aa-tRNA\_eEF1A\_GTP\_18] \\
&\quad - k23f \cdot [80S\_aa-tRNA\_eEF1A\_GTP\_18] \\
\frac{d[80S\_aa-tRNA\_18]}{dt} &= k23f \cdot [80S\_aa-tRNA\_eEF1A\_GTP\_18] \\
&\quad - (k25f \cdot [eEF2\_GTP] \cdot [80S\_aa-tRNA\_18] - k25b \cdot [80S\_aa-tRNA\_eEF2\_GTP\_18]) \\
\frac{d[80S\_aa-tRNA\_eEF2\_GTP\_18]}{dt} &= k25f \cdot [eEF2\_GTP] \cdot [80S\_aa-tRNA\_18] - k25b \cdot [80S\_aa-tRNA\_eEF2\_GTP\_18] \\
&\quad - k26f \cdot [80S\_aa-tRNA\_eEF2\_GTP\_18] \\
\frac{d[80S\_tRNA\_18]}{dt} &= k26f \cdot [80S\_aa-tRNA\_eEF2\_GTP\_17] - k28f \cdot [80S\_tRNA\_18] \cdot [eEF3\_GTP] \\
\frac{d[80S\_tRNA\_eEF3\_GTP\_18]}{dt} &= k28f \cdot [80S\_tRNA\_18] \cdot [eEF3\_GTP] - k29f \cdot [80S\_tRNA\_eEF3\_GTP\_18] \\
\frac{d[80S\_19]}{dt} &= k29f \cdot [80S\_tRNA\_eEF3\_GTP\_19] \\
&\quad - (k22f \cdot [aa-tRNA\_eEF1A\_GTP] \cdot [80S\_19] - k22b \cdot [80S\_aa-tRNA\_eEF1A\_GTP\_19]) \\
\frac{d[80S\_aa-tRNA\_eEF1A\_GTP\_19]}{dt} &= k22f \cdot [aa-tRNA\_eEF1A\_GTP] \cdot [80S\_19] - k22b \cdot [80S\_aa-tRNA\_eEF1A\_GTP\_19] \\
&\quad - k23f \cdot [80S\_aa-tRNA\_eEF1A\_GTP\_19] \\
\frac{d[80S\_aa-tRNA\_19]}{dt} &= k23f \cdot [80S\_aa-tRNA\_eEF1A\_GTP\_19] \\
&\quad - (k25f \cdot [eEF2\_GTP] \cdot [80S\_aa-tRNA\_19] - k25b \cdot [80S\_aa-tRNA\_eEF2\_GTP\_19]) \\
\frac{d[80S\_aa-tRNA\_eEF2\_GTP\_19]}{dt} &= k25f \cdot [eEF2\_GTP] \cdot [80S\_aa-tRNA\_19] - k25b \cdot [80S\_aa-tRNA\_eEF2\_GTP\_19] \\
&\quad - k26f \cdot [80S\_aa-tRNA\_eEF2\_GTP\_19] \\
\frac{d[80S\_tRNA\_19]}{dt} &= k26f \cdot [80S\_aa-tRNA\_eEF2\_GTP\_18] - k28f \cdot [80S\_tRNA\_19] \cdot [eEF3\_GTP] \\
\frac{d[80S\_tRNA\_eEF3\_GTP\_19]}{dt} &= k28f \cdot [80S\_tRNA\_19] \cdot [eEF3\_GTP] - k29f \cdot [80S\_tRNA\_eEF3\_GTP\_19] \\
\frac{d[80S\_20]}{dt} &= k29f \cdot [80S\_tRNA\_eEF3\_GTP\_20] - k1_{r32} \cdot [eRF1\_eRF3\_GTP] \cdot [80S\_20] \\
\frac{d[80S\_tRNA\_20]}{dt} &= k26f \cdot [80S\_aa-tRNA\_eEF2\_GTP\_19] - k28f \cdot [80S\_tRNA\_20] \cdot [eEF3\_GTP] \\
\frac{d[80S\_tRNA\_eEF3\_GTP\_20]}{dt} &= k28f \cdot [80S\_tRNA\_20] \cdot [eEF3\_GTP] - k29f \cdot [80S\_tRNA\_eEF3\_GTP\_20] \\
\frac{d[eRF3\_GDP]}{dt} &= k1_{r33} \cdot [80S\_eRF1\_eRF3\_GTP] - (k1_{r30} \cdot [eRF3\_GDP] - k2_{r30} \cdot [eRF3\_GTP]) \\
\frac{d[eRF3\_GTP]}{dt} &= k1_{r30} \cdot [eRF3\_GDP] - k2_{r30} \cdot [eRF3\_GTP] \\
&\quad - (k1_{r31} \cdot [eRF1] \cdot [eRF3\_GTP] - k2_{r31} \cdot [eRF1\_eRF3\_GTP]) \\
\frac{d[eRF1]}{dt} &= k1_{r33} \cdot [80S\_eRF1\_eRF3\_GTP] - (k1_{r31} \cdot [eRF1] \cdot [eRF3\_GTP] - k2_{r31} \cdot [eRF1\_eRF3\_GTP]) \\
\frac{d[eRF1\_eRF3\_GTP]}{dt} &= k1_{r31} \cdot [eRF1] \cdot [eRF3\_GTP] - k2_{r31} \cdot [eRF1\_eRF3\_GTP] \\
&\quad - k1_{r32} \cdot [eRF1\_eRF3\_GTP] \cdot [80S\_20] \\
\frac{d[80S\_eRF1\_eRF3\_GTP]}{dt} &= k1_{r32} \cdot [eRF1\_eRF3\_GTP] \cdot [80S\_20] - k1_{r33} \cdot [80S\_eRF1\_eRF3\_GTP]
\end{aligned}$$

$$\begin{aligned}
\text{mRNA\_init\_free} = & \text{mRNA\_tot} - ([80\text{S}_1] + [80\text{S\_aa-tRNA\_eEF1A\_GTP}_1] \\
& + [80\text{S\_aa-tRNA}_1] + [80\text{S\_aa-tRNA\_eEF2\_GTP}_1] + [80\text{S}_2] + [80\text{S\_aa-tRNA\_eEF1A\_GTP}_2] \\
& + [80\text{S\_aa-tRNA}_2] + [80\text{S\_aa-tRNA\_eEF2\_GTP}_2] + [80\text{S\_tRNA}_2] + [80\text{S\_tRNA\_eEF3\_GTP}_2] \\
& + [80\text{S}_3] + [80\text{S\_aa-tRNA\_eEF1A\_GTP}_3] + [80\text{S\_aa-tRNA}_3] + [80\text{S\_aa-tRNA\_eEF2\_GTP}_3] \\
& + [80\text{S\_tRNA}_3] + [80\text{S\_tRNA\_eEF3\_GTP}_3] + [80\text{S}_4] + [80\text{S\_aa-tRNA\_eEF1A\_GTP}_4] \\
& + [80\text{S\_aa-tRNA}_4] + [80\text{S\_aa-tRNA\_eEF2\_GTP}_4] + [80\text{S\_tRNA}_4] + [80\text{S\_tRNA\_eEF3\_GTP}_4] \\
& + [80\text{S}_5] + [80\text{S\_aa-tRNA\_eEF1A\_GTP}_5] + [80\text{S\_aa-tRNA}_5] + [80\text{S\_aa-tRNA\_eEF2\_GTP}_5] \\
& + [80\text{S\_tRNA}_5] + [80\text{S\_tRNA\_eEF3\_GTP}_5] + [80\text{S}_6] + [80\text{S\_aa-tRNA\_eEF1A\_GTP}_6] \\
& + [80\text{S\_aa-tRNA}_6] + [80\text{S\_aa-tRNA\_eEF2\_GTP}_6] + [80\text{S\_tRNA}_6] + [80\text{S\_tRNA\_eEF3\_GTP}_6] \\
& + [80\text{S}_7] + [80\text{S\_aa-tRNA\_eEF1A\_GTP}_7] + [80\text{S\_aa-tRNA}_7] + [80\text{S\_aa-tRNA\_eEF2\_GTP}_7] \\
& + [80\text{S\_tRNA}_7] + [80\text{S\_tRNA\_eEF3\_GTP}_7] + [80\text{S}_8] + [80\text{S\_aa-tRNA\_eEF1A\_GTP}_8] \\
& + [80\text{S\_aa-tRNA}_8] + [80\text{S\_aa-tRNA\_eEF2\_GTP}_8] + [80\text{S\_tRNA}_8] + [80\text{S\_tRNA\_eEF3\_GTP}_8] \\
& + [80\text{S\_tRNA}_9] + [80\text{S\_tRNA\_eEF3\_GTP}_9] + [80\text{S}_{10}] + [80\text{S\_aa-tRNA\_eEF1A\_GTP}_{10}] \\
& + [80\text{S\_aa-tRNA}_{10}] + [80\text{S\_aa-tRNA\_eEF2\_GTP}_{10}] + [80\text{S\_tRNA}_{10}] + [80\text{S\_tRNA\_eEF3\_GTP}_{10}] \\
& + [80\text{S}_{11}] + [80\text{S\_aa-tRNA\_eEF1A\_GTP}_{11}] + [80\text{S\_aa-tRNA}_{11}] + [80\text{S\_aa-tRNA\_eEF2\_GTP}_{11}] \\
& + [80\text{S\_tRNA}_{11}] + [80\text{S\_tRNA\_eEF3\_GTP}_{11}] + [80\text{S}_{12}] + [80\text{S\_aa-tRNA\_eEF1A\_GTP}_{12}] \\
& + [80\text{S\_aa-tRNA}_{12}] + [80\text{S\_aa-tRNA\_eEF2\_GTP}_{12}] + [80\text{S\_tRNA}_{12}] + [80\text{S\_tRNA\_eEF3\_GTP}_{12}] \\
& + [80\text{S}_{13}] + [80\text{S\_aa-tRNA\_eEF1A\_GTP}_{13}] + [80\text{S\_aa-tRNA}_{13}] + [80\text{S\_aa-tRNA\_eEF2\_GTP}_{13}] \\
& + [80\text{S\_tRNA}_{13}] + [80\text{S\_tRNA\_eEF3\_GTP}_{13}] + [80\text{S}_{14}] + [80\text{S\_aa-tRNA\_eEF1A\_GTP}_{14}] \\
& + [80\text{S\_aa-tRNA}_{14}] + [80\text{S\_aa-tRNA\_eEF2\_GTP}_{14}] + [80\text{S\_tRNA}_{14}] + [80\text{S\_tRNA\_eEF3\_GTP}_{14}] \\
& + [80\text{S}_{15}] + [80\text{S\_aa-tRNA\_eEF1A\_GTP}_{15}] + [80\text{S\_aa-tRNA}_{15}] + [80\text{S\_aa-tRNA\_eEF2\_GTP}_{15}] \\
& + [80\text{S\_tRNA}_{15}] + [80\text{S\_tRNA\_eEF3\_GTP}_{15}])
\end{aligned}$$













**Supplementary Table I. Strains used in this study**

| Strain Name                                    | Strain collection number | Derived from: | Genotype (difference from a parental strain)                      | Source                       |
|------------------------------------------------|--------------------------|---------------|-------------------------------------------------------------------|------------------------------|
| WT                                             | PTC41                    | W303          | MAT $\alpha$ <i>ade2-1 ura3-1 leu2-3, 112 his3-11,15 can1-100</i> | M. Tuite, University of Kent |
| <i>tetO7RPS5</i>                               | PTC389                   | PTC41         | <i>RPS5-PtetO7:KanMX</i>                                          | This study                   |
| <i>tetO7SUI1</i>                               | PTC277                   | PTC41         | <i>SUI1-PtetO7:KanMX</i>                                          | This study                   |
| <i>tetO7TIF11</i>                              | PTC269                   | PTC41         | <i>TIF11-PtetO7:KanMX</i>                                         | This study                   |
| <i>tetO7SUI2</i>                               | PTC390                   | PTC41         | <i>SUI2-PtetO7:KanMX</i>                                          | This study                   |
| <i>tetO7CGD11</i>                              | PTC273                   | PTC41         | <i>GCD11-PtetO7:KanMX</i>                                         | This study                   |
| <i>tetO7GCD6</i>                               | PTC272                   | PTC41         | <i>GCD6-PtetO7:KanMX</i>                                          | This study                   |
| <i>tetO7GCD1</i>                               | PTC400                   | PTC41         | <i>GCD1-PtetO7:KanMX</i>                                          | This study                   |
| <i>tetO7RPG1-60</i>                            | PTC391                   | PTC41         | <i>RPG1-60bp-PtetO7:KanMX</i>                                     | This study                   |
| <i>tetO7NIP1-60</i>                            | PTC401                   | PTC41         | <i>NIP1-60bp-PtetO7:KanMX</i>                                     | This study                   |
| <i>tetO7HCRI</i>                               | PTC270                   | PTC41         | <i>HCRI-PtetO7:KanMX</i>                                          | This study                   |
| <i>TIF1<math>\Delta</math></i>                 | PTC392                   | PTC41         | <i>TIF1<math>\Delta</math></i>                                    | This study                   |
| <i>TIF2<math>\Delta</math></i>                 | PTC267                   | PTC41         | <i>TIF2<math>\Delta</math></i>                                    | This study                   |
| <i>tetO7TIF2 TIF1<math>\Delta</math></i>       | PTC393                   | PTC392        | <i>TIF2-PtetO7:KanMX</i>                                          | This study                   |
| <i>tetO7TIF3</i>                               | PTC394                   | PTC41         | <i>TIF3-PtetO7:KanMX</i>                                          | This study                   |
| <i>tetO7CDC33</i>                              | PTC278                   | PTC41         | <i>CDC33-PtetO7:KanMX</i>                                         | This study                   |
| <i>TIF4632<math>\Delta</math></i>              | PTC274                   | PTC41         | <i>TIF4632<math>\Delta</math></i>                                 | This study                   |
| <i>tetO7TIF4631 TIF4632<math>\Delta</math></i> | PTC276                   | PTC274        | <i>TIF4631-PtetO7:KanMX</i>                                       | This study                   |
| <i>tetO7TIF5</i>                               | PTC268                   | PTC41         | <i>TIF5-PtetO7:KanMX</i>                                          | This study                   |
| <i>tetO7FUN12</i>                              | PTC265                   | PTC41         | <i>FUN12-PtetO7:KanMX</i>                                         | This study                   |
| <i>TEF1<math>\Delta</math></i>                 | PTC402                   | PTC41         | <i>TEF1<math>\Delta</math></i>                                    | This study                   |
| <i>TEF2<math>\Delta</math></i>                 | PTC354                   | PTC41         | <i>TEF2<math>\Delta</math></i>                                    | This study                   |
| <i>tetO7TEF1 TEF2<math>\Delta</math></i>       | PTC362                   | PTC354        | <i>TEF1-PtetO7:KanMX</i>                                          | This study                   |
| <i>tetO7TEF5</i>                               | PTC363                   | PTC41         | <i>TEF5-PtetO7:KanMX</i>                                          | This study                   |
| <i>EFT1<math>\Delta</math></i>                 | PTC403                   | PTC41         | <i>EFT1<math>\Delta</math></i>                                    | This study                   |
| <i>EFT2<math>\Delta</math></i>                 | PTC355                   | PTC41         | <i>EFT2<math>\Delta</math></i>                                    | This study                   |
| <i>tetO7EFT1 EFT2<math>\Delta</math></i>       | PTC364                   | PTC355        | <i>EFT1-PtetO7:KanMX</i>                                          | This study                   |
| <i>tetO7YEF3</i>                               | PTC365                   | PTC41         | <i>YEF3-PtetO7:KanMX</i>                                          | This study                   |
| <i>tetO7SUP35</i>                              | PTC367                   | PTC41         | <i>SUP35-PtetO7:KanMX</i>                                         | This study                   |
| <i>tetO7SUP45</i>                              | PTC366                   | PTC41         | <i>SUP45-PtetO7:KanMX</i>                                         | This study                   |
| <i>tetO7DBP5</i>                               | PTC398                   | PTC41         | <i>DBP5-PtetO7:KanMX</i>                                          | This study                   |
| <i>tetO7DED1-30</i>                            | PTC397                   | PTC41         | <i>DED1-30bp-PtetO7:KanMX</i>                                     | This study                   |
| <i>tetO7HYP2</i>                               | PTC395                   | PTC41         | <i>HYP2-PtetO7:KanMX</i>                                          | This study                   |
| <i>tetO7PAB1</i>                               | PTC271                   | PTC41         | <i>PAB1-PtetO7:KanMX</i>                                          | This study                   |
| <i>competitor</i>                              | PTC404                   | PTC41         | <i>lys2<math>\Delta</math>:KanMX</i>                              | This study                   |

**Supplementary Table II. Plasmids constructed in this study**

| <b>Plasmid Name</b>   | <b>Plasmid collection number</b> | <b>Description:</b>                                                              |
|-----------------------|----------------------------------|----------------------------------------------------------------------------------|
| <i>pTRPEX</i>         | pJM798                           | <i>GPF</i> promoter in <i>YCp33-Supex2</i> substituted with <i>TEF1</i> promoter |
| <i>pTEFEX</i>         | pJM815                           | <i>GPF</i> promoter in <i>YCp33-Supex2</i> substituted with <i>TRP1</i> promoter |
| <i>pTRPEX SUI1</i>    | pJM790                           | <i>SUI1</i> gene under control of <i>TRP1</i> promoter                           |
| <i>pLEUEX SUI1</i>    | pJM860                           | <i>SUI1</i> gene under control of truncated <i>LEU4</i> promoter                 |
| <i>pPGKEX SUI1</i>    | pJM866                           | <i>SUI1</i> gene under control of truncated <i>PGK1</i> promoter                 |
| <i>pTEFEX SUI1</i>    | pJM832                           | <i>SUI1</i> gene under control of <i>TEF1</i> promoter                           |
| <i>pTEFEX TIF11</i>   | pJM822                           | <i>TIF11</i> gene under control of <i>TEF1</i> promoter                          |
| <i>pTRPEX TIF11</i>   | pJM810                           | <i>TIF11</i> gene under control of <i>TRP1</i> promoter                          |
| <i>pTRPEX SUI2</i>    | pJM804                           | <i>SUI2</i> gene under control of <i>TRP1</i> promoter                           |
| <i>pLEUEX SUI2</i>    | pJM862                           | <i>SUI2</i> gene under control of truncated <i>LEU4</i> promoter                 |
| <i>pPGKEX SUI2</i>    | pJM867                           | <i>SUI2</i> gene under control of truncated <i>PGK1</i> promoter                 |
| <i>pTEFEX GCD1</i>    | pJM901                           | <i>GCD1</i> gene under control of <i>TEF1</i> promoter                           |
| <i>pTRPEX GCD1</i>    | pJM902                           | <i>GCD1</i> gene under control of <i>TRP1</i> promoter                           |
| <i>pTEFEX GCD6</i>    | pJM826                           | <i>GCD6</i> gene under control of <i>TEF1</i> promoter                           |
| <i>pTRPEX GCD6</i>    | pJM808                           | <i>GCD6</i> gene under control of <i>TRP1</i> promoter                           |
| <i>pTEFEX RPG1</i>    | pJM827                           | <i>RPG1</i> gene under control of <i>TEF1</i> promoter                           |
| <i>pPGKEX RPG1</i>    | pJM869                           | <i>RPG1</i> gene under control of truncated <i>PGK1</i> promoter                 |
| <i>pTRPEX RPG1</i>    | pJM809                           | <i>RPG1</i> gene under control of <i>TRP1</i> promoter                           |
| <i>pTEFEX NIP1</i>    | pJM880                           | <i>NIP1</i> gene under control of <i>TEF1</i> promoter                           |
| <i>pTRPEX NIP1</i>    | pJM881                           | <i>NIP1</i> gene under control of <i>TRP1</i> promoter                           |
| <i>pTEFEX HCR1</i>    | pJM824                           | <i>HCR1</i> gene under control of <i>TEF1</i> promoter                           |
| <i>pTEFEX TIF1</i>    | pJM817                           | <i>TIF1</i> gene under control of <i>TEF1</i> promoter                           |
| <i>pTRPEX TIF1</i>    | pJM813                           | <i>TIF1</i> gene under control of <i>TRP1</i> promoter                           |
| <i>pTEFEX TIF3</i>    | pJM825                           | <i>TIF3</i> gene under control of <i>TEF1</i> promoter                           |
| <i>pTRPEX TIF3</i>    | pJM806                           | <i>TIF3</i> gene under control of <i>TRP1</i> promoter                           |
| <i>pTEFEX CDC33</i>   | pJM882                           | <i>CDC33</i> gene under control of <i>TEF1</i> promoter                          |
| <i>pTRPEX CDC33</i>   | pJM883                           | <i>CDC33</i> gene under control of <i>TRP1</i> promoter                          |
| <i>pTEFEX TIF4631</i> | pJM884                           | <i>TIF4631</i> gene under control of <i>TEF1</i> promoter                        |
| <i>pTRPEX TIF4631</i> | pJM885                           | <i>TIF4631</i> gene under control of <i>TRP1</i> promoter                        |
| <i>pTEFEX TIF5</i>    | pJM820                           | <i>TIF5</i> gene under control of <i>TEF1</i> promoter                           |
| <i>pTRPEX TIF5</i>    | pJM807                           | <i>TIF5</i> gene under control of <i>TRP1</i> promoter                           |
| <i>pTEFEX FUN12</i>   | pJM821                           | <i>FUN12</i> gene under control of <i>TEF1</i> promoter                          |
| <i>pTRPEX FUN12</i>   | pJM886                           | <i>FUN12</i> gene under control of <i>TRP1</i> promoter                          |
| <i>pTEFEX DED1</i>    | pJM816                           | <i>DED1</i> gene under control of <i>TEF1</i> promoter                           |
| <i>pTRPEX DED1</i>    | pJM799                           | <i>DED1</i> gene under control of <i>TRP1</i> promoter                           |
| <i>pLEUEX DED1</i>    | pJM887                           | <i>DED1</i> gene under control of truncated <i>LEU4</i> promoter                 |
| <i>pPGKEX DED1</i>    | pJM888                           | <i>DED1</i> gene under control of truncated <i>PGK1</i> promoter                 |
| <i>pTEFEX PAB1</i>    | pJM823                           | <i>PAB1</i> gene under control of <i>TEF1</i> promoter                           |
| <i>pTRPEX PAB1</i>    | pJM889                           | <i>PAB1</i> gene under control of <i>TRP1</i> promoter                           |
| <i>pTEFEX TEF1</i>    | pJM890                           | <i>TEF1</i> gene under control of <i>TEF1</i> promoter                           |
| <i>pTEF5EX TEF1</i>   | pJM913                           | <i>TEF1</i> gene under control of <i>TEF5</i> promoter                           |
| <i>pTEFEX TEF5</i>    | pJM891                           | <i>TEF5</i> gene under control of <i>TEF1</i> promoter                           |
| <i>pTEFEX YEF3</i>    | pJM892                           | <i>YEF3</i> gene under control of <i>TEF1</i> promoter                           |

|                             |        |                                                                                                                                                               |
|-----------------------------|--------|---------------------------------------------------------------------------------------------------------------------------------------------------------------|
| <i>pTRPEX SUP45</i>         | pJM805 | <i>SUP45</i> gene under control of <i>TRP1</i> promoter                                                                                                       |
| <i>pTEFEX SUP35</i>         | pJM893 | <i>SUP35</i> gene under control of <i>TEF1</i> promoter                                                                                                       |
| <i>pTEFEX HYP2</i>          | pJM894 | <i>HYP2</i> gene under control of <i>TEF1</i> promoter                                                                                                        |
| <i>pTRPEX HYP2</i>          | pJM895 | <i>HYP2</i> gene under control of <i>TRP1</i> promoter                                                                                                        |
| <i>pTEFEX DBP5</i>          | pJM896 | <i>DBP5</i> gene under control of <i>TEF1</i> promoter                                                                                                        |
| <i>pTRPEX DBP5</i>          | pJM897 | <i>DBP5</i> gene under control of <i>TRP1</i> promoter                                                                                                        |
| <i>pTRPEX RPS5</i>          | pJM802 | <i>RPS5</i> gene under control of <i>TRP1</i> promoter                                                                                                        |
| <i>pTRPEX-HIS3L2-LucF</i>   | pJM898 | <i>Firefly</i> luciferase gene with L2 mRNA leader sequence under control of <i>TRP1</i> promoter                                                             |
| <i>pDCDEX L0-LucR</i>       | pJM899 | <i>Renilla</i> luciferase gene with L0 mRNA leader sequence under control of <i>DCD1</i> promoter                                                             |
| <i>pDLV L2-LucF L0-LucR</i> | pJM900 | Scanning competence assay vector containing two luciferase genes – <i>Renilla</i> and <i>Firefly</i> – preceded by leader sequences (L0 and L2, respectively) |

**Supplementary Table III. Interactions of translation machinery components**

| <b>Translation Factor</b> | <b>Reported direct interactions</b>                                           | <b>Source</b>                                                                                                                                                                                                                                                                                                  |
|---------------------------|-------------------------------------------------------------------------------|----------------------------------------------------------------------------------------------------------------------------------------------------------------------------------------------------------------------------------------------------------------------------------------------------------------|
| eIF1                      | eIF2, eIF3, eIF4G, eIF5, R,                                                   | Asano <i>et al.</i> , 2000; He <i>et al.</i> , 2003; Singh <i>et al.</i> , 2004; Passmore <i>et al.</i> , 2007; Reibarkh <i>et al.</i> , 2008 ;                                                                                                                                                                |
| eIF1A                     | eIF2, eIF3, eIF5B, R,                                                         | Fekete <i>et al.</i> , 2007; Fringer <i>et al.</i> , 2007; Olsen <i>et al.</i> , 2003; Passmore <i>et al.</i> , 2007; Zheng <i>et al.</i> , 2011;                                                                                                                                                              |
| eIF2                      | eIF1, eIF1A, eIF2B, eIF3, eIF5, R, mRNA, Met-tRNA <sub>i</sub> <sup>Met</sup> | Assano <i>et al.</i> , 1999; Bushman <i>et al.</i> , 1993; Kimball 1999; Laurino <i>et al.</i> , 1999; Mohammad-Qureshi <i>et al.</i> , 2007; Olsen <i>et al.</i> , 2003; Singh <i>et al.</i> , 2004; Valasek <i>et al.</i> , 2002;                                                                            |
| eIF2B                     | eIF2,                                                                         | Bushman <i>et al.</i> , 1993; Mohammad-Qureshi <i>et al.</i> , 2007;                                                                                                                                                                                                                                           |
| eIF3                      | eIF1, eIF1A, eIF2, eIF4B, eIF5, R,                                            | Asano <i>et al.</i> , 2000; Valasek <i>et al.</i> , 2002; Valasek <i>et al.</i> , 2003; Vornloche <i>et al.</i> , 1999; Olsen <i>et al.</i> , 2003;                                                                                                                                                            |
| eIF4A                     | eIF4G, mRNA,                                                                  | Dominguez <i>et al.</i> , 1999; Marsden <i>et al.</i> , 2006; Neff and Sachs 1999; Rogers <i>et al.</i> , 1999; Schütz <i>et al.</i> , 2008;                                                                                                                                                                   |
| eIF4B                     | eIF3, mRNA,                                                                   | Altmann <i>et al.</i> , 1995; Marsden <i>et al.</i> , 2006; Vornloche <i>et al.</i> , 1999;                                                                                                                                                                                                                    |
| eIF4E                     | eIF4G, mRNA,                                                                  | Altmann <i>et al.</i> , 1997; Mader <i>et al.</i> , 1995; Kiraga-Motoszko <i>et al.</i> , 2011;                                                                                                                                                                                                                |
| eIF4G                     | eIF1, eIF4A, eIF4E, eIF5, Ded1, Pab1, mRNA,                                   | Altmann <i>et al.</i> , 1997; Berset <i>et al.</i> , 2003; Dominguez <i>et al.</i> , 1999; Goyer <i>et al.</i> , 1993; He <i>et al.</i> , 2003; Hilliker <i>et al.</i> , 2011; Mader <i>et al.</i> , 1995; Neff and Sachs 1999; Schütz <i>et al.</i> , 2008; Tarun and Sachs 1996; Wells <i>et al.</i> , 1998; |
| eIF5                      | eIF1, eIF2, eIF3, eIF4G, R,                                                   | Assano <i>et al.</i> , 1999; Asano <i>et al.</i> , 2000; He <i>et al.</i> , 2003; Phan <i>et al.</i> , 1998; Reibarkh <i>et al.</i> , 2008; Singh <i>et al.</i> , 2004; Valasek <i>et al.</i> , 2003;                                                                                                          |
| eIF5B                     | eIF1A, R,                                                                     | Fringer <i>et al.</i> , 2007; Olsen <i>et al.</i> , 2003; Zheng <i>et al.</i> , 2011;                                                                                                                                                                                                                          |
| eEF1A                     | eEF1B, eEF3, R,                                                               | Anand <i>et al.</i> , 2006; Chakraborty and Triana-Alonso 1998; Kovalchuk <i>et al.</i> , 1998; Pedersen <i>et al.</i> , 2001; Pittman <i>et al.</i> , 2009;                                                                                                                                                   |
| eEF1B                     | eEF1A,                                                                        | Pedersen <i>et al.</i> , 2001; Pittman <i>et al.</i> , 2009;                                                                                                                                                                                                                                                   |
| eEF2                      | Hyp2, R,                                                                      | Nilsson <i>et al.</i> , 2007; Spahn <i>et al.</i> , 2004; Zanelli <i>et al.</i> , 2006;                                                                                                                                                                                                                        |
| eEF3                      | eEF1A, R,                                                                     | Anand <i>et al.</i> , 2006; Andersen <i>et al.</i> , 2006; Chakraborty and Triana-Alonso 1998; Dasmahapatra and Chakraborty 1981; Kovalchuk <i>et al.</i> , 1998; Skogerson and Wakatama 1976; Triana-Alonso <i>et al.</i> , 1995;                                                                             |
| eRF1                      | Dbp5, eRF3, R,                                                                | Eurwilaichitr <i>et al.</i> , 1999; Frolova <i>et al.</i> , 2000; Gross <i>et al.</i> , 2007; Kobayashi <i>et al.</i> , 2004;                                                                                                                                                                                  |
| eRF3                      | eRF1, Pab1,                                                                   | Eurwilaichitr <i>et al.</i> , 1999; Hosoda <i>et al.</i> , 2003; Kobayashi <i>et al.</i> , 2004;                                                                                                                                                                                                               |
| Dbp5                      | eRF1, mRNA,                                                                   | Estruch and Cole 2003; Gross <i>et al.</i> , 2007;                                                                                                                                                                                                                                                             |
| Ded1                      | eIF4G, mRNA,                                                                  | Chuang <i>et al.</i> , 1997; Iost <i>et al.</i> , 1999; Hilliker <i>et al.</i> , 2011; Marsden <i>et al.</i> , 2006;                                                                                                                                                                                           |
| Hyp2                      | eEF2, R,                                                                      | Jao <i>et al.</i> , 2006; Zanelli <i>et al.</i> , 2006;                                                                                                                                                                                                                                                        |
| Pab1                      | eIF4G, eRF3, mRNA,                                                            | Hosoda <i>et al.</i> , 2003; Kobayashi <i>et al.</i> , 2004; Tarun and Sachs 1996; Wells <i>et al.</i> , 1998;                                                                                                                                                                                                 |

R – ribosome

### References – Supplementary Table III

- Altmann, M., Schmitz, N., Berset, C., and Trachsel, H. (1997). A novel inhibitor of cap-dependent translation initiation in yeast: p20 competes with eIF4G for binding to eIF4E. *EMBO J.* *16*, 1114–1121.
- Altmann, M., Wittmer, B., Méthot, N., Sonenberg, N., and Trachsel, H. (1995). The *Saccharomyces cerevisiae* translation initiation factor Tif3 and its mammalian homologue, eIF-4B, have RNA annealing activity. *EMBO J.* *14*, 3820–3827.
- Anand, M., Balar, B., Ulloque, R., Gross, S.R., and Kinzy, T.G. (2006). Domain and nucleotide dependence of the interaction between *Saccharomyces cerevisiae* translation elongation factors 3 and 1A. *J. Biol. Chem.* *281*, 32318–32326.
- Andersen, C.B.F., Becker, T., Blau, M., Anand, M., Halic, M., Balar, B., Mielke, T., Boesen, T., Pedersen, J.S., Spahn, C.M.T., et al. (2006). Structure of eEF3 and the mechanism of transfer RNA release from the E-site. *Nature* *443*, 663–668.
- Asano, K., Clayton, J., Shalev, A., and Hinnebusch, A.G. (2000). A multifactor complex of eukaryotic initiation factors, eIF1, eIF2, eIF3, eIF5, and initiator tRNA(Met) is an important translation initiation intermediate in vivo. *Genes Dev.* *14*, 2534–2546.
- Asano, K., Krishnamoorthy, T., Phan, L., Pavitt, G.D., and Hinnebusch, A.G. (1999). Conserved bipartite motifs in yeast eIF5 and eIF2Bepsilon, GTPase-activating and GDP-GTP exchange factors in translation initiation, mediate binding to their common substrate eIF2. *EMBO J.* *18*, 1673–1688.
- Berset, C., Zurbriggen, A., Djafarzadeh, S., Altmann, M., and Trachsel, H. (2003). RNA-binding activity of translation initiation factor eIF4G1 from *Saccharomyces cerevisiae*. *RNA* *9*, 871–880.
- Bushman, J.L., Foiani, M., Cigan, A.M., Paddon, C.J., and Hinnebusch, A.G. (1993). Guanine nucleotide exchange factor for eukaryotic translation initiation factor 2 in *Saccharomyces cerevisiae*: interactions between the essential subunits GCD2, GCD6, and GCD7 and the regulatory subunit GCN3. *Mol. Cell. Biol.* *13*, 4618–4631.
- Chakraborty, K., and Triana-Alonso, F.J. (1998). Yeast elongation factor 3: structure and function. *Biol. Chem.* *379*, 831–840.
- Chuang, R.Y., Weaver, P.L., Liu, Z., and Chang, T.H. (1997). Requirement of the DEAD-Box protein ded1p for messenger RNA translation. *Science* *275*, 1468–1471.
- Dasmahapatra, B., and Chakraborty, K. (1981). Protein synthesis in yeast. I. Purification and properties of elongation factor 3 from *Saccharomyces cerevisiae*. *J. Biol. Chem.* *256*, 9999–10004.
- Dominguez, D., Altmann, M., Benz, J., Baumann, U., and Trachsel, H. (1999). Interaction of translation initiation factor eIF4G with eIF4A in the yeast *Saccharomyces cerevisiae*. *J. Biol. Chem.* *274*, 26720–26726.
- Estruch, F., and Cole, C.N. (2003). An early function during transcription for the yeast mRNA export factor Dbp5p/Rat8p suggested by its genetic and physical interactions with transcription factor IIIH components. *Mol. Biol. Cell* *14*, 1664–1676.
- Eurwilaichitr, L., Graves, F.M., Stansfield, I., and Tuite, M.F. (1999). The C-terminus of eRF1 defines a functionally important domain for translation termination in *Saccharomyces cerevisiae*. *Mol. Microbiol.* *32*, 485–496.



- Fekete, C.A., Mitchell, S.F., Cherkasova, V.A., Applefield, D., Algire, M.A., Maag, D., Saini, A.K., Lorsch, J.R., and Hinnebusch, A.G. (2007). N- and C-terminal residues of eIF1A have opposing effects on the fidelity of start codon selection. *EMBO J.* *26*, 1602–1614.
- Fringer, J.M., Acker, M.G., Fekete, C.A., Lorsch, J.R., and Dever, T.E. (2007). Coupled release of eukaryotic translation initiation factors 5B and 1A from 80S ribosomes following subunit joining. *Mol. Cell. Biol.* *27*, 2384–2397.
- Frolova, L.Y., Merkulova, T.I., and Kisselev, L.L. (2000). Translation termination in eukaryotes: polypeptide release factor eRF1 is composed of functionally and structurally distinct domains. *RNA* *6*, 381–390.
- Goyer, C., Altmann, M., Lee, H.S., Blanc, A., Deshmukh, M., Woolford, J.L., Jr, Trachsel, H., and Sonenberg, N. (1993). TIF4631 and TIF4632: two yeast genes encoding the high-molecular-weight subunits of the cap-binding protein complex (eukaryotic initiation factor 4F) contain an RNA recognition motif-like sequence and carry out an essential function. *Mol. Cell. Biol.* *13*, 4860–4874.
- Gross, T., Siepmann, A., Sturm, D., Windgassen, M., Scarcelli, J.J., Seedorf, M., Cole, C.N., and Krebber, H. (2007). The DEAD-box RNA helicase Dbp5 functions in translation termination. *Science* *315*, 646–649.
- He, H., von der Haar, T., Singh, C.R., Ii, M., Li, B., Hinnebusch, A.G., McCarthy, J.E.G., and Asano, K. (2003). The yeast eukaryotic initiation factor 4G (eIF4G) HEAT domain interacts with eIF1 and eIF5 and is involved in stringent AUG selection. *Mol. Cell. Biol.* *23*, 5431–5445.
- Hilliker, A., Gao, Z., Jankowsky, E., and Parker, R. (2011). The DEAD-box protein Ded1 modulates translation by the formation and resolution of an eIF4F-mRNA complex. *Mol. Cell* *43*, 962–972.
- Hosoda, N., Kobayashi, T., Uchida, N., Funakoshi, Y., Kikuchi, Y., Hoshino, S., and Katada, T. (2003). Translation termination factor eRF3 mediates mRNA decay through the regulation of deadenylation. *J. Biol. Chem.* *278*, 38287–38291.
- Iost, I., Dreyfus, M., and Linder, P. (1999). Ded1p, a DEAD-box protein required for translation initiation in *Saccharomyces cerevisiae*, is an RNA helicase. *J. Biol. Chem.* *274*, 17677–17683.
- Jao, D.L.-E., and Chen, K.Y. (2006). Tandem affinity purification revealed the hypusine-dependent binding of eukaryotic initiation factor 5A to the translating 80S ribosomal complex. *J. Cell. Biochem.* *97*, 583–598.
- Kimball, S.R. (1999). Eukaryotic initiation factor eIF2. *Int. J. Biochem. Cell Biol.* *31*, 25–29.
- Kiraga-Motoszko, K., Niedzwiecka, A., Modrak-Wojcik, A., Stepinski, J., Darzynkiewicz, E., and Stolarski, R. (2011). Thermodynamics of molecular recognition of mRNA 5' cap by yeast eukaryotic initiation factor 4E. *J Phys Chem B* *115*, 8746–8754.
- Kobayashi, T., Funakoshi, Y., Hoshino, S.-I., and Katada, T. (2004). The GTP-binding release factor eRF3 as a key mediator coupling translation termination to mRNA decay. *J. Biol. Chem.* *279*, 45693–45700.
- Kovalchuk, O., Kambampati, R., Pladies, E., and Chakraborty, K. (1998). Competition and cooperation among yeast elongation factors. *Eur. J. Biochem.* *258*, 986–993.
- Laurino, J.P., Thompson, G.M., Pacheco, E., and Castilho, B.A. (1999). The beta subunit of eukaryotic translation initiation factor 2 binds mRNA through the lysine repeats and a region comprising the C2-C2 motif. *Mol. Cell. Biol.* *19*, 173–181.

- Mader, S., Lee, H., Pause, A., and Sonenberg, N. (1995). The translation initiation factor eIF-4E binds to a common motif shared by the translation factor eIF-4 gamma and the translational repressors 4E-binding proteins. *Mol. Cell. Biol.* *15*, 4990–4997.
- Marsden, S., Nardelli, M., Linder, P., and McCarthy, J.E.G. (2006). Unwinding single RNA molecules using helicases involved in eukaryotic translation initiation. *J. Mol. Biol.* *361*, 327–335.
- Mohammad-Qureshi, S.S., Haddad, R., Hemingway, E.J., Richardson, J.P., and Pavitt, G.D. (2007). Critical contacts between the eukaryotic initiation factor 2B (eIF2B) catalytic domain and both eIF2beta and -2gamma mediate guanine nucleotide exchange. *Mol. Cell. Biol.* *27*, 5225–5234.
- Neff, C.L., and Sachs, A.B. (1999). Eukaryotic translation initiation factors 4G and 4A from *Saccharomyces cerevisiae* interact physically and functionally. *Mol. Cell. Biol.* *19*, 5557–5564.
- Nilsson, J., Sengupta, J., Gursky, R., Nissen, P., and Frank, J. (2007). Comparison of fungal 80 S ribosomes by cryo-EM reveals diversity in structure and conformation of rRNA expansion segments. *J. Mol. Biol.* *369*, 429–438.
- Olsen, D.S., Savner, E.M., Mathew, A., Zhang, F., Krishnamoorthy, T., Phan, L., and Hinnebusch, A.G. (2003). Domains of eIF1A that mediate binding to eIF2, eIF3 and eIF5B and promote ternary complex recruitment in vivo. *EMBO J.* *22*, 193–204.
- Passmore, L.A., Schmeing, T.M., Maag, D., Applefield, D.J., Acker, M.G., Algire, M.A., Lorsch, J.R., and Ramakrishnan, V. (2007). The eukaryotic translation initiation factors eIF1 and eIF1A induce an open conformation of the 40S ribosome. *Mol. Cell* *26*, 41–50.
- Pedersen, L., Andersen, G.R., Knudsen, C.R., Kinzy, T.G., and Nyborg, J. (2001). Crystallization of the yeast elongation factor complex eEF1A-eEF1B alpha. *Acta Crystallogr. D Biol. Crystallogr.* *57*, 159–161.
- Phan, L., Zhang, X., Asano, K., Anderson, J., Vornlocher, H.P., Greenberg, J.R., Qin, J., and Hinnebusch, A.G. (1998). Identification of a translation initiation factor 3 (eIF3) core complex, conserved in yeast and mammals, that interacts with eIF5. *Mol. Cell. Biol.* *18*, 4935–4946.
- Pittman, Y.R., Kandl, K., Lewis, M., Valente, L., and Kinzy, T.G. (2009). Coordination of eukaryotic translation elongation factor 1A (eEF1A) function in actin organization and translation elongation by the guanine nucleotide exchange factor eEF1Balpha. *J. Biol. Chem.* *284*, 4739–4747.
- Reibarkh, M., Yamamoto, Y., Singh, C.R., del Rio, F., Fahmy, A., Lee, B., Luna, R.E., Ii, M., Wagner, G., and Asano, K. (2008). Eukaryotic initiation factor (eIF) 1 carries two distinct eIF5-binding faces important for multifactor assembly and AUG selection. *J. Biol. Chem.* *283*, 1094–1103.
- Rogers, G.W., Jr, Richter, N.J., and Merrick, W.C. (1999). Biochemical and kinetic characterization of the RNA helicase activity of eukaryotic initiation factor 4A. *J. Biol. Chem.* *274*, 12236–12244.
- Schütz, P., Bumann, M., Oberholzer, A.E., Bieniossek, C., Trachsel, H., Altmann, M., and Baumann, U. (2008). Crystal structure of the yeast eIF4A-eIF4G complex: an RNA-helicase controlled by protein-protein interactions. *Proc. Natl. Acad. Sci. U.S.A.* *105*, 9564–9569.
- Singh, C.R., He, H., Ii, M., Yamamoto, Y., and Asano, K. (2004). Efficient incorporation of eukaryotic initiation factor 1 into the multifactor complex is critical for formation of functional ribosomal preinitiation complexes in vivo. *J. Biol. Chem.* *279*, 31910–31920.
- Skogerson, L., and Wakatama, E. (1976). A ribosome-dependent GTPase from yeast distinct from elongation

factor 2. *Proc. Natl. Acad. Sci. U.S.A.* *73*, 73–76.

Spahn, C.M.T., Gomez-Lorenzo, M.G., Grassucci, R.A., Jørgensen, R., Andersen, G.R., Beckmann, R., Penczek, P.A., Ballesta, J.P.G., and Frank, J. (2004). Domain movements of elongation factor eEF2 and the eukaryotic 80S ribosome facilitate tRNA translocation. *EMBO J.* *23*, 1008–1019.

Tarun, S.Z., Jr, and Sachs, A.B. (1996). Association of the yeast poly(A) tail binding protein with translation initiation factor eIF-4G. *EMBO J.* *15*, 7168–7177.

Triana-Alonso, F.J., Chakraburttu, K., and Nierhaus, K.H. (1995). The elongation factor 3 unique in higher fungi and essential for protein biosynthesis is an E site factor. *J. Biol. Chem.* *270*, 20473–20478.

Valásek, L., Mathew, A.A., Shin, B.-S., Nielsen, K.H., Szamecz, B., and Hinnebusch, A.G. (2003). The yeast eIF3 subunits TIF32/a, NIP1/c, and eIF5 make critical connections with the 40S ribosome in vivo. *Genes Dev.* *17*, 786–799.

Valásek, L., Nielsen, K.H., and Hinnebusch, A.G. (2002). Direct eIF2-eIF3 contact in the multifactor complex is important for translation initiation in vivo. *EMBO J.* *21*, 5886–5898.

Vornlocher, H.P., Hanachi, P., Ribeiro, S., and Hershey, J.W. (1999). A 110-kilodalton subunit of translation initiation factor eIF3 and an associated 135-kilodalton protein are encoded by the *Saccharomyces cerevisiae* TIF32 and TIF31 genes. *J. Biol. Chem.* *274*, 16802–16812.

Wells, S.E., Hillner, P.E., Vale, R.D., and Sachs, A.B. (1998). Circularization of mRNA by eukaryotic translation initiation factors. *Mol. Cell* *2*, 135–140.

Zanelli, C.F., Maragno, A.L.C., Gregio, A.P.B., Komili, S., Pandolfi, J.R., Mestriner, C.A., Lustrì, W.R., and Valentini, S.R. (2006). eIF5A binds to translational machinery components and affects translation in yeast. *Biochem. Biophys. Res. Commun.* *348*, 1358–1366.

Zheng, A., Yamamoto, R., Sokabe, M., Tanaka, I., and Yao, M. (2011). Crystallization and preliminary X-ray crystallographic analysis of eIF5B $\Delta$ N and the eIF5B $\Delta$ N-eIF1A $\Delta$ N complex. *Acta Crystallogr. Sect. F Struct. Biol. Cryst. Commun.* *67*, 730–733.

| Quantified protein     | Ribo3 Q-peptides                                |
|------------------------|-------------------------------------------------|
| P40512 <br>CSN11_YEAST | ISHEVVQDDSFSLLR<br>YFDCCTK                      |
| P02994 <br>EF1A_YEAST  | IGGIGTVPVGR<br>SHINVVVIGHVDVSGK                 |
| P16521 <br>EF3A_YEAST  | IVVEYIAAIGADLIDER<br>LVLAAGTWQRPHLIVLDEPTNYLDR  |
| P14741 <br>eI2BA_YEAST | IAEIGVDFIADDDIILVHGYSR<br>NLHLYGDWENCK          |
| P32502 <br>eI2BB_YEAST | LSPLYPFVDEK<br>TFTVLVTEGFNNTK                   |
| P09032 <br>eI2BG_YEAST | GSNLAPFTQPDFPFQTQNK<br>LSNCYIEGHYVVEPK          |
| P53235 <br>eIF2A_YEAST | TSQDIELFQSYPTFEQSNTNSK<br>WNPLGNAILCLAITDFDSSNK |
| P06103 <br>eIF3B_YEAST | DFSFAPEGVK<br>YLVTFSTEPIIVEEDNEFSPFTK           |
| P32497 <br>eIF3C_YEAST | DQLDSADYVDNLIDGLSTILSK<br>VVEVLQSVIAELEIPAK     |
| Q04067 <br>eIF3G_YEAST | GLAFVTFSSVEAEQALR<br>GSPAGPSAVTAR               |
| P40217 <br>eIF3I_YEAST | EFIILGGGQEAQK<br>YETDCPLNTAVITPLK               |
| P05453 <br>ERF3_YEAST  | FVAQIAIVELK<br>VIAVLETEAPVCVETYQDYPQLGR         |
| Q12099 <br>FAL1_YEAST  | GIYSYGFEAPSSIQSR<br>HGCQAVSGTPGR                |
| P34167 <br>IF4B_YEAST  | EDAPDLDWGAAR<br>GGGADVWSSAR                     |
| P39936 <br>IF4F2_YEAST | AQPISDIYEFAYPENVERPDIK<br>WEDDGETLK             |
| P38431 <br>IF5_YEAST   | GGGLSISDIAQGK<br>NPETEIITK                      |
| P25637 <br>YIH1_YEAST  | HINSTAR<br>WFGGAHIGPDR                          |

| Quantified protein     | Ribo4 Q-peptides                              |
|------------------------|-----------------------------------------------|
| P32324 <br>EF2_YEAST   | AEQLYEGPADDANCIAIK<br>FSVSPVVQVAVEVK          |
| P12754 <br>eI2BD_YEAST | DASNEEDSNSK<br>VITEFGALPPSSVPVILR             |
| P32501 <br>eI2BE_YEAST | CLLPLANVPLIEYTFLEFLAK<br>TIEPAAFVLDK          |
| P38249 <br>eIF3A_YEAST | LATLPAPLDLSAWDIEK<br>SGNNLVDLSDADTLQR         |
| P12385 <br>ERF1_YEAST  | GLILAGSADFK<br>VAEVAVQNFITNDK                 |
| P38912 <br>IF1A_YEAST  | DFQDDQCDVVHK<br>VEASCFDGNK                    |
| P20459 <br>IF2A_YEAST  | AVTATEDAELQALLESK<br>LSIIDETVWEGIEPPSK        |
| P09064 <br>IF2B_YEAST  | EGTPSANSSIQQEVGLPYSELLSR<br>TIFSNIQDIAEK      |
| P32481 <br>IF2G_YEAST  | FAVPGGLIGVGTK<br>GTIADGAPIVPISAQLK            |
| P39730 <br>IF2P_YEAST  | GVVVQASTLGSLEALLDFLK<br>IQLELAEQGLNSELYFQNK   |
| P10081 <br>IF4A_YEAST  | GIDVQQVSLVINYDLPANK<br>GVFGYGFEEPSAIQQR       |
| P07260 <br>IF4E_YEAST  | GADIDELWLR<br>NDVRPEWEDEANAK                  |
| P39935 <br>IF4F1_YEAST | DATPIEDVFSFNYPEGIEGPDIK<br>SDEAEAEVEAEAGDAGTK |
| P19211 <br>IF5A1_YEAST | LEDLSPSTHNLEVPFVK<br>VHLVTLDIFTGK             |
| P23301 <br>IF5A2_YEAST | APEGELGDSLQTAFDEGK<br>VHLVAIDIFTGK            |
| Q12522 <br>IF6_YEAST   | GLLVPTQTDDQELQHLR<br>TQFENSNEIGVFSK           |
| P32911 <br>SUI1_YEAST  | SFDPFADTGDDETATSNIYHIR<br>TLTTVQGVPEEYDLK     |
| Q03690 <br>TIF31_YEAST | GGDEAAIAASNQDLK<br>SVDELLFIEGDSSNSK           |

| Quantified protein     | Ribo1 Q-peptides                                     |
|------------------------|------------------------------------------------------|
| P02994 <br>EF1A_YEAST  | IGGIGTVPVGR<br>SHINVVVIGHVDSGK                       |
| P14741 <br>eI2BA_YEAST | GIPVTLIVDSAVGAVIDK<br>VFGAEGVAESGGIINLVGTYSVGVLAHNAR |
| P32502 <br>eI2BB_YEAST | QVAIQGIK<br>TPVFAVAGLYK                              |
| P06103 <br>eIF3B_YEAST | NINDNNDVSASLK<br>IFDVQPEDASDDFTTIEEIVEEVLEETK        |
| P40217 <br>eIF3I_YEAST | NPGSINIYEIER<br>VQGHFGPLNTVAISPQGTSYASGGEDGFIR       |
| P05453 <br>ERF3_YEAST  | ISESTHNTNNANVTSADALIK<br>DQGTTIAIGK                  |
| Q12099 <br>FAL1_YEAST  | GIYSYGFEAPSSIQSR<br>DLQALILSPTR                      |
| P39936 <br>IF4F2_YEAST | YTYGPTFLQFK<br>EAPKPTGEANEVVIDGK                     |
| P38431 <br>IF5_YEAST   | GGGLSISDIAQ GK<br>LQDVLDFGINK                        |
| P32324 <br>EF2_YEAST   | TDGNSFLINLIDSPGHVDFSEVTAALR<br>AYLPVNESFGFTGELR      |
| P32501 <br>eI2BE_YEAST | LQAVVLTDSYETR<br>HIYAYLTDEYAVR                       |
| P12385 <br>ERF1_YEAST  | LSVLSAITSTQQK<br>NFGATLEFITDK                        |
| P38912 <br>IF1A_YEAST  | NQGELPENAK<br>EEGQEYAQITK                            |
| P39730 <br>IF2P_YEAST  | VISLEINHQPVQEVK<br>IFNADVIYHLDFSFTAYQEK              |
| P07260 <br>IF4E_YEAST  | GADIDELWLR<br>TVLSDSAHFDVK                           |
| P39935 <br>IF4F1_YEAST | DATPIEDVFSFNYPEGIEGPDIK<br>ADAEWVQSTASK              |
| P19211 <br>IF5A1_YEAST | LEDLSPSTHNLEVPFVK<br>VHLVTLIDFTGK                    |
| P23301 <br>IF5A2_YEAST | APEGELGDSLQTA FDEGK<br>VHLVAIDIFTGK                  |

| Quantified protein     | Ribo2 Q-peptides                                                 |
|------------------------|------------------------------------------------------------------|
| P40512 <br>CSN11_YEAST | IGHLLSINYGEK<br>LQFSYLSSTLGIDLEDIK                               |
| P16521 <br>EF3A_YEAST  | VGNVGEDDAIPEVSHAGDVSTTLQVVNELLK<br>TVYVEHDIDGTHSDTSVLDFVFESEGVGK |
| P09032 <br>eI2BG_YEAST | GSNLAPFTQPDFPFQ TQNK<br>EISVVAPVDEIELIESGLTSFLSLR                |
| P53235 <br>eIF2A_YEAST | VSLTTGPVHDF TWSPTSR<br>LSDVYDLHFSPAGNYLSTWER                     |
| P32497 <br>eIF3C_YEAST | DQLDSADYVDNLIDGLSTILSK<br>ISLNSSNNASADER                         |
| Q04067 <br>eIF3G_YEAST | LGEEVELR<br>GSPAGPSAVTAR                                         |
| P34167 <br>IF4B_YEAST  | SGGFGGSFGGR<br>GAQFGKPPQTK                                       |
| P25637 <br>YIH1_YEAST  | QEDGSIIIVK<br>QDGSAA TYQSDDDGETAAGSR                             |
| P12754 <br>eI2BD_YEAST | VLTELLHNAISLK<br>VITEFGALPPSSVPVILR                              |
| P38249 <br>eIF3A_YEAST | LATLPAPLDLSAWDIEK<br>TAGGSSPATPATPATPTPSSGPK                     |
| P20459 <br>IF2A_YEAST  | GIEQLESAIEK<br>LVAAPLYVLTQALDK                                   |
| P09064 <br>IF2B_YEAST  | EGTPSANSSIQEVGLPYSELLSR<br>TIFSNIQDIAEK                          |
| P32481 <br>IF2G_YEAST  | YNIDAVNEFIVK<br>EFEEGGLPEQPLNPDFSK                               |
| P10081 <br>IF4A_YEAST  | TGTF SIAALQR<br>GVFYGFEEPSAIQQR                                  |
| Q12522 <br>IF6_YEAST   | GLLVPTQTTDQELQHLR<br>LQDAQPESISGNLR                              |
| P32911 <br>SUI1_YEAST  | SDFPFADTGDDETATS NYIHIR<br>TLTTVQGVPEEYDLK                       |
| Q03690 <br>TIF31_YEAST | ELDSQIVHYEQNLK<br>FVEPTTFLSLSDLTIIPR                             |

#### Supplementary Table IV QconCAT peptides

The proteins to be quantitated were distributed over four QconCATs (Ribo1 - Ribo4), with two peptides per protein. A stringent set of rules were followed to select the most 'quantotypic' peptides from each protein. The Ribo1/Ribo2 peptides were generated first, with the Ribo3/Ribo4 peptides synthesised later using a modified set of rules with the aim of increasing the number of successful Q-peptides per protein. Note that some of the peptide sequences did not correspond to proteins studied in this work.

**Supplementary Table Va - Transition list for QconCAT 'Ribo 3'.** Using data independent acquisition on a Waters Synapt G2 mass spectrometer, transition lists were created. These provide information on the precursor retention time ('prec retT') as well as the product ion fragment number ('frag str') and mass/charge ('product m\_z'). Acquisitions to optimise the collision energy ('ColE') and cone voltage ('ConeV') for each peptide were performed prior to quantification runs. For each peptide, in both heavy (QconCAT) and light (yeast analyte), two transitions were acquired. Peptide modification carbamidomethyl cysteine displayed as CAM+C.



|         |        |                       |                                |       |   |          |     |          |       |   |   |    |    |
|---------|--------|-----------------------|--------------------------------|-------|---|----------|-----|----------|-------|---|---|----|----|
| Ribo3_2 | P25637 | 13C+KR(16)            | WFGGAHIGPDR_heavy              | 24.12 | 2 | 609.800  | y10 | 516.760  |       | 2 | 1 | 25 | 40 |
| Ribo3_2 | P25637 | 13C+KR(16)            | WFGGAHIGPDR_light              | 24.12 | 2 | 606.800  | y5  | 557.300  |       | 1 | 1 | 28 | 40 |
| Ribo3_2 | P25637 | 13C+KR(16)            | WFGGAHIGPDR_light              | 24.12 | 2 | 606.800  | y10 | 513.760  |       | 2 | 1 | 25 | 40 |
| Ribo3_2 | P14741 | CAM+C(11);13C+KR(12)  | NLHLYGDWENCK_heavy             | 24.79 | 3 | 518.909  | y4  | 556.250  | 900   | 1 | 1 | 15 | 25 |
| Ribo3_2 | P14741 | CAM+C(11);13C+KR(12)  | NLHLYGDWENCK_heavy             | 24.79 | 3 | 518.909  | y8  | 1077.442 | 693   | 1 | 1 | 18 | 25 |
| Ribo3_2 | P14741 | CAM+C(11);13C+KR(12)  | NLHLYGDWENCK_light             | 24.79 | 3 | 516.909  | y4  | 550.250  | 900   | 1 | 1 | 15 | 25 |
| Ribo3_2 | P14741 | CAM+C(11);13C+KR(12)  | NLHLYGDWENCK_light             | 24.79 | 3 | 516.909  | y8  | 1071.442 | 693   | 1 | 1 | 18 | 25 |
| Ribo3_2 | P06103 | 13C+KR(10)            | DFSFAPEGVK_heavy               | 26.08 | 2 | 551.780  | y8  | 840.454  | 9125  | 1 | 1 | 19 | 25 |
| Ribo3_2 | P06103 | 13C+KR(10)            | DFSFAPEGVK_heavy               | 26.08 | 2 | 551.780  | y7  | 753.427  | 3379  | 1 | 1 | 19 | 25 |
| Ribo3_2 | P06103 | 13C+KR(10)            | DFSFAPEGVK_light               | 26.08 | 2 | 548.780  | y8  | 834.454  | 9125  | 1 | 1 | 19 | 25 |
| Ribo3_2 | P06103 | 13C+KR(10)            | DFSFAPEGVK_light               | 26.08 | 2 | 548.780  | y7  | 747.427  | 3379  | 1 | 1 | 19 | 25 |
| Ribo3_2 | P40512 | 13C+KR(15)            | ISHEVVQDDSFLLR_heavy           | 26.33 | 3 | 584.308  | y6  | 728.440  | 3832  | 1 | 1 | 21 | 25 |
| Ribo3_2 | P40512 | 13C+KR(15)            | ISHEVVQDDSFLLR_heavy           | 26.33 | 3 | 584.308  | y5  | 641.408  | 2090  | 1 | 1 | 21 | 25 |
| Ribo3_2 | P40512 | 13C+KR(15)            | ISHEVVQDDSFLLR_light           | 26.33 | 3 | 582.308  | y6  | 722.440  | 3832  | 1 | 1 | 21 | 25 |
| Ribo3_2 | P40512 | 13C+KR(15)            | ISHEVVQDDSFLLR_light           | 26.33 | 3 | 582.308  | y5  | 635.408  | 2090  | 1 | 1 | 21 | 25 |
| Ribo3_2 | P53235 | 13C+KR(22)            | TSQDIELFQSYPTFEQSNTNSK_heavy   | 28.16 | 2 | 1285.604 | y11 | 1258.601 | 2309  | 1 | 1 | 41 | 35 |
| Ribo3_2 | P53235 | 13C+KR(22)            | TSQDIELFQSYPTFEQSNTNSK_heavy   | 28.16 | 2 | 1285.604 | y13 | 1508.692 | 193   | 1 | 1 | 41 | 35 |
| Ribo3_2 | P53235 | 13C+KR(22)            | TSQDIELFQSYPTFEQSNTNSK_light   | 28.16 | 2 | 1282.604 | y11 | 1252.601 | 2309  | 1 | 1 | 41 | 35 |
| Ribo3_2 | P53235 | 13C+KR(22)            | TSQDIELFQSYPTFEQSNTNSK_light   | 28.16 | 2 | 1282.604 | y13 | 1502.692 | 193   | 1 | 1 | 41 | 35 |
| Ribo3_2 | P39936 | 13C+KR(18);13C+KR(22) | AQPISDIYEFAYPENVERPDIK_heavy   | 28.75 | 3 | 869.444  | y20 | 1204.114 | 55402 | 2 | 2 | 27 | 35 |
| Ribo3_2 | P39936 | 13C+KR(18);13C+KR(22) | AQPISDIYEFAYPENVERPDIK_heavy   | 28.75 | 3 | 869.444  | y10 | 1208.670 | 4316  | 1 | 2 | 34 | 35 |
| Ribo3_2 | P39936 | 13C+KR(18);13C+KR(22) | AQPISDIYEFAYPENVERPDIK_light   | 28.75 | 3 | 865.444  | y20 | 1198.114 | 55402 | 2 | 2 | 27 | 35 |
| Ribo3_2 | P39936 | 13C+KR(18);13C+KR(22) | AQPISDIYEFAYPENVERPDIK_light   | 28.75 | 3 | 865.444  | y10 | 1196.670 | 4316  | 1 | 2 | 34 | 35 |
| Ribo3_2 | P09032 | 13C+KR(19)            | GSNLAPFTQPDFPFQTNK_heavy       | 29.30 | 2 | 1072.031 | y14 | 850.918  | 5223  | 2 | 1 | 34 | 35 |
| Ribo3_2 | P09032 | 13C+KR(19)            | GSNLAPFTQPDFPFQTNK_heavy       | 29.30 | 2 | 1072.031 | y11 | 1355.667 | 464   | 1 | 1 | 34 | 35 |
| Ribo3_2 | P09032 | 13C+KR(19)            | GSNLAPFTQPDFPFQTNK_light       | 29.30 | 2 | 1069.031 | y14 | 847.918  | 5223  | 2 | 1 | 34 | 35 |
| Ribo3_2 | P09032 | 13C+KR(19)            | GSNLAPFTQPDFPFQTNK_light       | 29.30 | 2 | 1069.031 | y11 | 1349.667 | 464   | 1 | 1 | 34 | 35 |
| Ribo3_2 | P05453 | 13C+KR(11)            | FVAQIAIVELK_heavy              | 29.55 | 2 | 618.886  | y6  | 678.447  | 1062  | 1 | 1 | 22 | 25 |
| Ribo3_2 | P05453 | 13C+KR(11)            | FVAQIAIVELK_heavy              | 29.55 | 2 | 618.886  | y7  | 791.533  | 964   | 1 | 1 | 22 | 35 |
| Ribo3_2 | P05453 | 13C+KR(11)            | FVAQIAIVELK_light              | 29.55 | 2 | 615.886  | y6  | 672.447  | 1062  | 1 | 1 | 22 | 25 |
| Ribo3_2 | P05453 | 13C+KR(11)            | FVAQIAIVELK_light              | 29.55 | 2 | 615.886  | y7  | 785.533  | 964   | 1 | 1 | 22 | 35 |
| Ribo3_2 | P05453 | CAM+C(12);13C+KR(24)  | VIAVLETEAPVCVETYQDYPQLGR_heavy | 29.75 | 3 | 919.468  | y5  | 576.355  | 2143  | 1 | 1 | 32 | 35 |
| Ribo3_2 | P05453 | CAM+C(12);13C+KR(24)  | VIAVLETEAPVCVETYQDYPQLGR_heavy | 29.75 | 3 | 919.468  | y6  | 739.420  | 1000  | 1 | 1 | 34 | 35 |
| Ribo3_2 | P05453 | CAM+C(12);13C+KR(24)  | VIAVLETEAPVCVETYQDYPQLGR_light | 29.75 | 3 | 917.468  | y5  | 570.355  | 2143  | 1 | 1 | 32 | 35 |
| Ribo3_2 | P05453 | CAM+C(12);13C+KR(24)  | VIAVLETEAPVCVETYQDYPQLGR_light | 29.75 | 3 | 917.468  | y6  | 733.420  | 1000  | 1 | 1 | 34 | 35 |
| Ribo3_2 | P32497 | 13C+KR(17)            | VVEVLQSVIAELEIPAK_heavy        | 35.94 | 3 | 615.034  | y3  | 321.223  | 1733  | 1 | 1 | 26 | 25 |
| Ribo3_2 | P32497 | 13C+KR(17)            | VVEVLQSVIAELEIPAK_heavy        | 35.94 | 3 | 615.034  | y8  | 876.516  | 1396  | 1 | 1 | 19 | 25 |
| Ribo3_2 | P32497 | 13C+KR(17)            | VVEVLQSVIAELEIPAK_light        | 35.94 | 3 | 613.034  | y3  | 315.223  | 1733  | 1 | 1 | 26 | 25 |
| Ribo3_2 | P32497 | 13C+KR(17)            | VVEVLQSVIAELEIPAK_light        | 35.94 | 3 | 613.034  | y8  | 870.516  | 1396  | 1 | 1 | 19 | 25 |
| Ribo3_2 | P32497 | 13C+KR(22)            | DQLDSADYVDNLIDGLSTILSK_heavy   | 39.15 | 2 | 1201.107 | y10 | 1052.629 | 1298  | 1 | 1 | 41 | 40 |
| Ribo3_2 | P32497 | 13C+KR(22)            | DQLDSADYVDNLIDGLSTILSK_heavy   | 39.15 | 2 | 1201.107 | y6  | 654.411  | 942   | 1 | 1 | 43 | 35 |
| Ribo3_2 | P32497 | 13C+KR(22)            | DQLDSADYVDNLIDGLSTILSK_light   | 39.15 | 2 | 1198.107 | y10 | 1046.629 | 1298  | 1 | 1 | 41 | 40 |
| Ribo3_2 | P32497 | 13C+KR(22)            | DQLDSADYVDNLIDGLSTILSK_light   | 39.15 | 2 | 1198.107 | y6  | 648.411  | 942   | 1 | 1 | 43 | 35 |



**Supplementary Table Vb - Transition list for QconCAT 'Ribo 4'**. Using data independent acquisition on a Waters Synapt G2 mass spectrometer, transition lists were created. These provide information on the precursor retention time ('precursor retT') as well as the product ion fragment number ('fragment str') and mass/charge ('product m\_'z). Acquisitions to optimise the collision energy ('ColE') and cone voltage ('ConeV') for each peptide were performed prior to quantification runs. For each peptide, in both heavy (QconCAT) and light (yeast analyte), two transitions were acquired.



|         |        |            |                               |       |   |          |     |          |      |   |   |    |    |
|---------|--------|------------|-------------------------------|-------|---|----------|-----|----------|------|---|---|----|----|
| Ribo4_2 | P12385 | 13C+KR(11) | GLILAGSADFK_light             | 26.55 | 2 | 546.319  | y7  | 695.355  | 1929 | 1 | 1 | 19 | 25 |
| Ribo4_2 | P32501 | 13C+KR(11) | TIEPAAFVLDK_heavy             | 27.76 | 2 | 605.344  | y8  | 866.509  | 5544 | 1 | 1 | 21 | 30 |
| Ribo4_2 | P32501 | 13C+KR(11) | TIEPAAFVLDK_heavy             | 27.76 | 2 | 605.344  | y9  | 995.552  | 4501 | 1 | 1 | 18 | 30 |
| Ribo4_2 | P32501 | 13C+KR(11) | TIEPAAFVLDK_light             | 27.76 | 2 | 602.344  | y8  | 860.509  | 5544 | 1 | 1 | 21 | 30 |
| Ribo4_2 | P32501 | 13C+KR(11) | TIEPAAFVLDK_light             | 27.76 | 2 | 602.344  | y9  | 989.552  | 4501 | 1 | 1 | 18 | 30 |
| Ribo4_2 | P07260 | 13C+KR(10) | GADIDELWLR_heavy              | 29.58 | 2 | 597.318  | y6  | 837.459  | 8700 | 1 | 1 | 21 | 25 |
| Ribo4_2 | P07260 | 13C+KR(10) | GADIDELWLR_heavy              | 29.58 | 2 | 597.318  | y5  | 722.430  | 2217 | 1 | 1 | 25 | 25 |
| Ribo4_2 | P07260 | 13C+KR(10) | GADIDELWLR_light              | 29.58 | 2 | 594.318  | y6  | 831.459  | 8700 | 1 | 1 | 21 | 25 |
| Ribo4_2 | P07260 | 13C+KR(10) | GADIDELWLR_light              | 29.58 | 2 | 594.318  | y5  | 716.430  | 2217 | 1 | 1 | 25 | 25 |
| Ribo4_2 | P39730 | 13C+KR(19) | IQLELAEQGLNSELYFQNK_heavy     | 29.70 | 2 | 1122.085 | y11 | 1318.670 |      | 1 | 1 | 36 | 35 |
| Ribo4_2 | P39730 | 13C+KR(19) | IQLELAEQGLNSELYFQNK_heavy     | 29.70 | 2 | 1122.085 | y12 | 1446.730 |      | 1 | 1 | 39 | 35 |
| Ribo4_2 | P39730 | 13C+KR(19) | IQLELAEQGLNSELYFQNK_light     | 29.70 | 2 | 1119.085 | y11 | 1312.670 |      | 1 | 1 | 36 | 35 |
| Ribo4_2 | P39730 | 13C+KR(19) | IQLELAEQGLNSELYFQNK_light     | 29.70 | 2 | 1119.085 | y12 | 1440.730 |      | 1 | 1 | 39 | 35 |
| Ribo4_2 | P10081 | 13C+KR(19) | GIDVQVSLVINYPANK_heavy        | 30.14 | 2 | 1046.574 | y4  | 435.267  | 440  | 1 | 1 | 43 | 30 |
| Ribo4_2 | P10081 | 13C+KR(19) | GIDVQVSLVINYPANK_heavy        | 30.14 | 2 | 1046.574 | y5  | 548.348  | 61   | 1 | 1 | 43 | 40 |
| Ribo4_2 | P10081 | 13C+KR(19) | GIDVQVSLVINYPANK_light        | 30.14 | 2 | 1043.574 | y4  | 429.267  | 440  | 1 | 1 | 43 | 30 |
| Ribo4_2 | P10081 | 13C+KR(19) | GIDVQVSLVINYPANK_light        | 30.14 | 2 | 1043.574 | y5  | 542.348  | 61   | 1 | 1 | 43 | 40 |
| Ribo4_2 | Q03690 | 13C+KR(17) | SVDELLTFIEGDSSNSK_heavy       | 32.54 | 2 | 923.956  | y10 | 1089.520 | 1823 | 1 | 1 | 32 | 30 |
| Ribo4_2 | Q03690 | 13C+KR(17) | SVDELLTFIEGDSSNSK_heavy       | 32.54 | 2 | 923.956  | y7  | 700.322  | 1778 | 1 | 1 | 32 | 40 |
| Ribo4_2 | Q03690 | 13C+KR(17) | SVDELLTFIEGDSSNSK_light       | 32.54 | 2 | 920.956  | y10 | 1083.520 | 1823 | 1 | 1 | 32 | 30 |
| Ribo4_2 | Q03690 | 13C+KR(17) | SVDELLTFIEGDSSNSK_light       | 32.54 | 2 | 920.956  | y7  | 694.322  | 1778 | 1 | 1 | 32 | 40 |
| Ribo4_2 | P39935 | 13C+KR(23) | DATPIEDVFSFNYPEGIEGPDIK_heavy | 33.35 | 2 | 1280.117 | y10 | 1060.567 | 1369 | 1 | 1 | 44 | 40 |
| Ribo4_2 | P39935 | 13C+KR(23) | DATPIEDVFSFNYPEGIEGPDIK_heavy | 33.35 | 2 | 1280.117 | y12 | 1337.639 | 949  | 1 | 1 | 41 | 40 |
| Ribo4_2 | P39935 | 13C+KR(23) | DATPIEDVFSFNYPEGIEGPDIK_light | 33.35 | 2 | 1277.117 | y10 | 1054.567 | 1369 | 1 | 1 | 44 | 40 |
| Ribo4_2 | P39935 | 13C+KR(23) | DATPIEDVFSFNYPEGIEGPDIK_light | 33.35 | 2 | 1277.117 | y12 | 1331.639 | 949  | 1 | 1 | 41 | 40 |
| Ribo4_2 | P39730 | 13C+KR(20) | GVVVQASTLGSLEALLDFLK_heavy    | 39.13 | 2 | 1033.597 | y13 | 1425.830 |      | 1 | 1 | 38 | 35 |
| Ribo4_2 | P39730 | 13C+KR(20) | GVVVQASTLGSLEALLDFLK_heavy    | 39.13 | 2 | 1033.597 | y14 | 1512.860 |      | 1 | 1 | 36 | 35 |
| Ribo4_2 | P39730 | 13C+KR(20) | GVVVQASTLGSLEALLDFLK_light    | 39.13 | 2 | 1030.597 | y13 | 1419.830 |      | 1 | 1 | 38 | 35 |
| Ribo4_2 | P39730 | 13C+KR(20) | GVVVQASTLGSLEALLDFLK_light    | 39.13 | 2 | 1030.597 | y14 | 1506.860 |      | 1 | 1 | 36 | 35 |

| Translation Factor                     | Entry name  | Acc    | Biological replicates                      | Average (cpc) | unique peptides | Abundance (cpc)                                              | SEM   |  |  |
|----------------------------------------|-------------|--------|--------------------------------------------|---------------|-----------------|--------------------------------------------------------------|-------|--|--|
| Initiation factor eIF1                 | SUI1_YEAST  | P32911 | Log_1                                      | 32,520        | 2               | eIF2 average:<br>34,000                                      | 2,000 |  |  |
|                                        |             |        | Log_2                                      | 37,345        | 2               |                                                              |       |  |  |
|                                        |             |        | Log_3                                      | 30,792        | 2               |                                                              |       |  |  |
| Initiation factor eIF1A                | IF1A_YEAST  | P38912 | Log_1                                      | 48,266        | 1               | eIF1A average:<br>57,000                                     | 5,500 |  |  |
|                                        |             |        | Log_2                                      | 67,203        | 1               |                                                              |       |  |  |
|                                        |             |        | Log_3                                      | 56,132        | 1               |                                                              |       |  |  |
| Initiation factor eIF2 $\alpha$        | IF2A_YEAST  | P20459 | Log_1                                      | 6,133         | 1               | eIF2 complex<br>average of $\beta$ and $\gamma$ :<br>29,000  | 2,100 |  |  |
|                                        |             |        | Log_2                                      | 8,215         | 1               |                                                              |       |  |  |
|                                        |             |        | Log_3                                      | 8,306         | 1               |                                                              |       |  |  |
| Initiation factor eIF2 $\beta$         | IF2B_YEAST  | P09064 | Log_1                                      | 20,690        | 1               |                                                              |       |  |  |
|                                        |             |        | Log_2                                      | 32,910        | 1               |                                                              |       |  |  |
|                                        |             |        | Log_3                                      | 27,986        | 1               |                                                              |       |  |  |
| Initiation factor eIF2 $\gamma$        | IF2G_YEAST  | P32481 | Log_1                                      | 32,844        | 3               |                                                              |       |  |  |
|                                        |             |        | Log_2                                      | 27,657        | 3               |                                                              |       |  |  |
|                                        |             |        | Log_3                                      | 31,588        | 3               |                                                              |       |  |  |
| Initiation factor eIF2 $\beta\alpha$   | eI2BA_YEAST | P14741 | Q-peptides not suitable for quantification |               |                 | eIF2B complex<br>average of $\beta$ to $\epsilon$ :<br>5,600 | 150   |  |  |
| Initiation factor eIF2 $\beta\beta$    | eI2BB_YEAST | P32502 | Log_1                                      | 5,394         | 2               |                                                              |       |  |  |
|                                        |             |        | Log_2                                      | 6,199         | 2               |                                                              |       |  |  |
|                                        |             |        | Log_3                                      | 5,521         | 2               |                                                              |       |  |  |
| Initiation factor eIF2 $\beta\delta$   | eI2BD_YEAST | P12754 | Log_1                                      | 4,079         | 1               |                                                              |       |  |  |
|                                        |             |        | Log_2                                      | 5,267         | 1               |                                                              |       |  |  |
|                                        |             |        | Log_3                                      | 5,257         | 1               |                                                              |       |  |  |
| Initiation factor eIF2 $\beta\epsilon$ | eI2BE_YEAST | P32501 | Log_1                                      | 5,057         | 3               |                                                              |       |  |  |
|                                        |             |        | Log_2                                      | 6,049         | 3               |                                                              |       |  |  |
|                                        |             |        | Log_3                                      | 6,010         | 3               |                                                              |       |  |  |
| Initiation factor eIF2 $\beta\gamma$   | eI2BG_YEAST | P09032 | Log_1                                      | 6,042         | 3               |                                                              |       |  |  |
|                                        |             |        | Log_2                                      | 6,533         | 3               |                                                              |       |  |  |
|                                        |             |        | Log_3                                      | 6,035         | 3               |                                                              |       |  |  |
| Initiation factor eIF3a                | eIF3A_YEAST | P38249 | Log_1                                      | 22,254        | 2               | eIF3 complex<br>average of a to g:<br>23,000                 | 1,200 |  |  |
|                                        |             |        | Log_2                                      | 31,602        | 2               |                                                              |       |  |  |
|                                        |             |        | Log_3                                      | 28,704        | 2               |                                                              |       |  |  |
| Initiation factor eIF3b                | eIF3B_YEAST | P06103 | Log_1                                      | 22,199        | 2               |                                                              |       |  |  |
|                                        |             |        | Log_2                                      | 19,081        | 3               |                                                              |       |  |  |
|                                        |             |        | Log_3                                      | 20,626        | 3               |                                                              |       |  |  |
| Initiation factor eIF3c                | eIF3C_YEAST | P32497 | Log_1                                      | 21,041        | 1               |                                                              |       |  |  |
|                                        |             |        | Log_2                                      | 17,807        | 1               |                                                              |       |  |  |
|                                        |             |        | Log_3                                      | 24,582        | 1               |                                                              |       |  |  |
| Initiation factor eIF3g                | eIF3G_YEAST | Q04067 | Log_1                                      | 20,827        | 3               |                                                              |       |  |  |
|                                        |             |        | Log_2                                      | 26,496        | 3               |                                                              |       |  |  |
|                                        |             |        | Log_3                                      | 19,430        | 3               |                                                              |       |  |  |
| Initiation factor                      | eIF3I_YEAST | P40217 | Log_1                                      | 14,669        | 4               |                                                              |       |  |  |

|                               |             |        |                                              |           |   |                             |        |
|-------------------------------|-------------|--------|----------------------------------------------|-----------|---|-----------------------------|--------|
| eIF3i                         |             |        | Log_2                                        | 17,205    | 4 |                             |        |
|                               |             |        | Log_3                                        | 15,814    | 4 |                             |        |
| Initiation factor<br>eIF4A    | IF4A_YEAST  | P10081 | Log_1                                        | 216,063   | 2 | eIF4A average:<br>240,000   | 16,000 |
|                               |             |        | Log_2                                        | 269,617   | 2 |                             |        |
|                               |             |        | Log_3                                        | 234,767   | 3 |                             |        |
| Initiation factor<br>eIF4B    | IF4B_YEAST  | P34167 | Log_1                                        | 27,655    | 3 | eIF4B average:<br>28,000    | 1,400  |
|                               |             |        | Log_2                                        | 30,976    | 3 |                             |        |
|                               |             |        | Log_3                                        | 26,395    | 2 |                             |        |
| Initiation factor<br>eIF4E    | IF4E_YEAST  | P07260 | Log_1                                        | 69,749    | 3 | eIF4E average:<br>80,000    | 5,700  |
|                               |             |        | Log_2                                        | 90,794    | 3 |                             |        |
|                               |             |        | Log_3                                        | 80,292    | 3 |                             |        |
| Initiation factor<br>eIF4G2   | IF4F2_YEAST | P39936 | Log_1                                        | 2,338     | 2 | total eIF4G =<br>22,000     | 2,700  |
|                               |             |        | Log_2                                        | 1,975     | 2 |                             |        |
|                               |             |        | Log_3                                        | 2,092     | 1 |                             |        |
| Initiation factor<br>eIF4G1   | IF4F1_YEAST | P39935 | Log_1                                        | 15,095    | 2 |                             |        |
|                               |             |        | Log_2                                        | 24,323    | 2 |                             |        |
|                               |             |        | Log_3                                        | 20,416    | 2 |                             |        |
| Initiation factor<br>eIF5     | IF5_YEAST   | P38431 | Log_1                                        | 18,246    | 2 | eIF5 average:<br>20,000     | 2,000  |
|                               |             |        | Log_2                                        | 24,357    | 2 |                             |        |
|                               |             |        | Log_3                                        | 18,358    | 2 |                             |        |
| Hyp2                          | IF5A2_YEAST | P23301 | Log_1                                        | 454,271   | 1 | Hyp2 average:<br>410,000    | 64,000 |
|                               |             |        | Log_2                                        | 526,435   | 1 |                             |        |
|                               |             |        | Log_3                                        | 444,213   | 1 |                             |        |
| Initiation factor<br>eIF5B    | IF2P_YEAST  | P39730 | Log_1                                        | 6,066     | 1 | eIF5B average:<br>4,800     | 900    |
|                               |             |        | Log_2                                        | 3,119     | 1 |                             |        |
|                               |             |        | Log_3                                        | 5,135     | 1 |                             |        |
| Elongation factor<br>eEF1A    | EF1A_YEAST  | P02994 | Log_1                                        | 1,036,757 | 1 | eEF1A average:<br>1,000,000 | 32,000 |
|                               |             |        | Log_2                                        | 1,102,238 | 1 |                             |        |
|                               |             |        | Log_3                                        | 991,534   | 1 |                             |        |
| Elongation factor<br>eEF1B    | EF1B_YEAST  | P32471 | Label free quantification (MS <sup>E</sup> ) |           |   | 79,000                      | 1,000  |
| Elongation factor<br>eEF2     | EF2_YEAST   | P32324 | Log_1                                        | 141,480   | 2 | eEF2 average:<br>140,000    | 3,900  |
|                               |             |        | Log_2                                        | 148,778   | 2 |                             |        |
|                               |             |        | Log_3                                        | 135,308   | 2 |                             |        |
| Elongation factor<br>eEF3     | EF3A_YEAST  | P16521 | Label free quantification (MS <sup>E</sup> ) |           |   | 110,000                     | 3,500  |
| Termination<br>factor<br>eRF1 | ERF1_YEAST  | P12385 | Log_1                                        | 23,081    | 2 | eRF1 average:<br>22,000     | 1,700  |
|                               |             |        | Log_2                                        | 19,244    | 1 |                             |        |
|                               |             |        | Log_3                                        | 24,881    | 2 |                             |        |
| Termination<br>factor<br>eRF3 | ERF3_YEAST  | P05453 | Log_1                                        | 14,935    | 1 | eRF3 average:<br>14,000     | 400    |
|                               |             |        | Log_2                                        | 13,893    | 1 |                             |        |
|                               |             |        | Log_3                                        | 13,738    | 1 |                             |        |
| Dbp5                          | DBP5_YEAST  | P20449 | Label free quantification (MS <sup>E</sup> ) |           |   | 15,000                      | 800    |
| Ded1                          | DED1_YEAST  | P06634 | Label free quantification (MS <sup>E</sup> ) |           |   | 28,000                      | 500    |

|      |            |        |                                              |        |       |
|------|------------|--------|----------------------------------------------|--------|-------|
| Pab1 | PABP_YEAST | P04147 | Label free quantification (MS <sup>E</sup> ) | 44,000 | 1,700 |
|------|------------|--------|----------------------------------------------|--------|-------|

### Supplementary Table VI

#### Abundance values for translation factors

Summary of the proteins quantitated and the quantitation method used. Proteins of interest in three biological replicates of exponentially growing yeast (Log<sub>1</sub> to <sub>3</sub>) were quantitated using QconCAT Q-peptides, selected to represent each protein. Individual abundance values (in copies per cell, cpc) for the biological replicates contain data from multiple analyses, in some instances using two different MS platforms (Waters Xevo triple quadrupole and Thermo LTQ-Orbitrap Velos) for the number of Q-peptides stated (see Supplementary Figure VII for correlation between the two MS instruments used). Errors define biological not technical variance (see Supplementary Figure VII for technical variation). Label-free quantitation data were obtained from data-independent MSE acquisition on a Waters Synapt G2, using four biological replicates of comparable yeast (data provided by P. Brownridge).

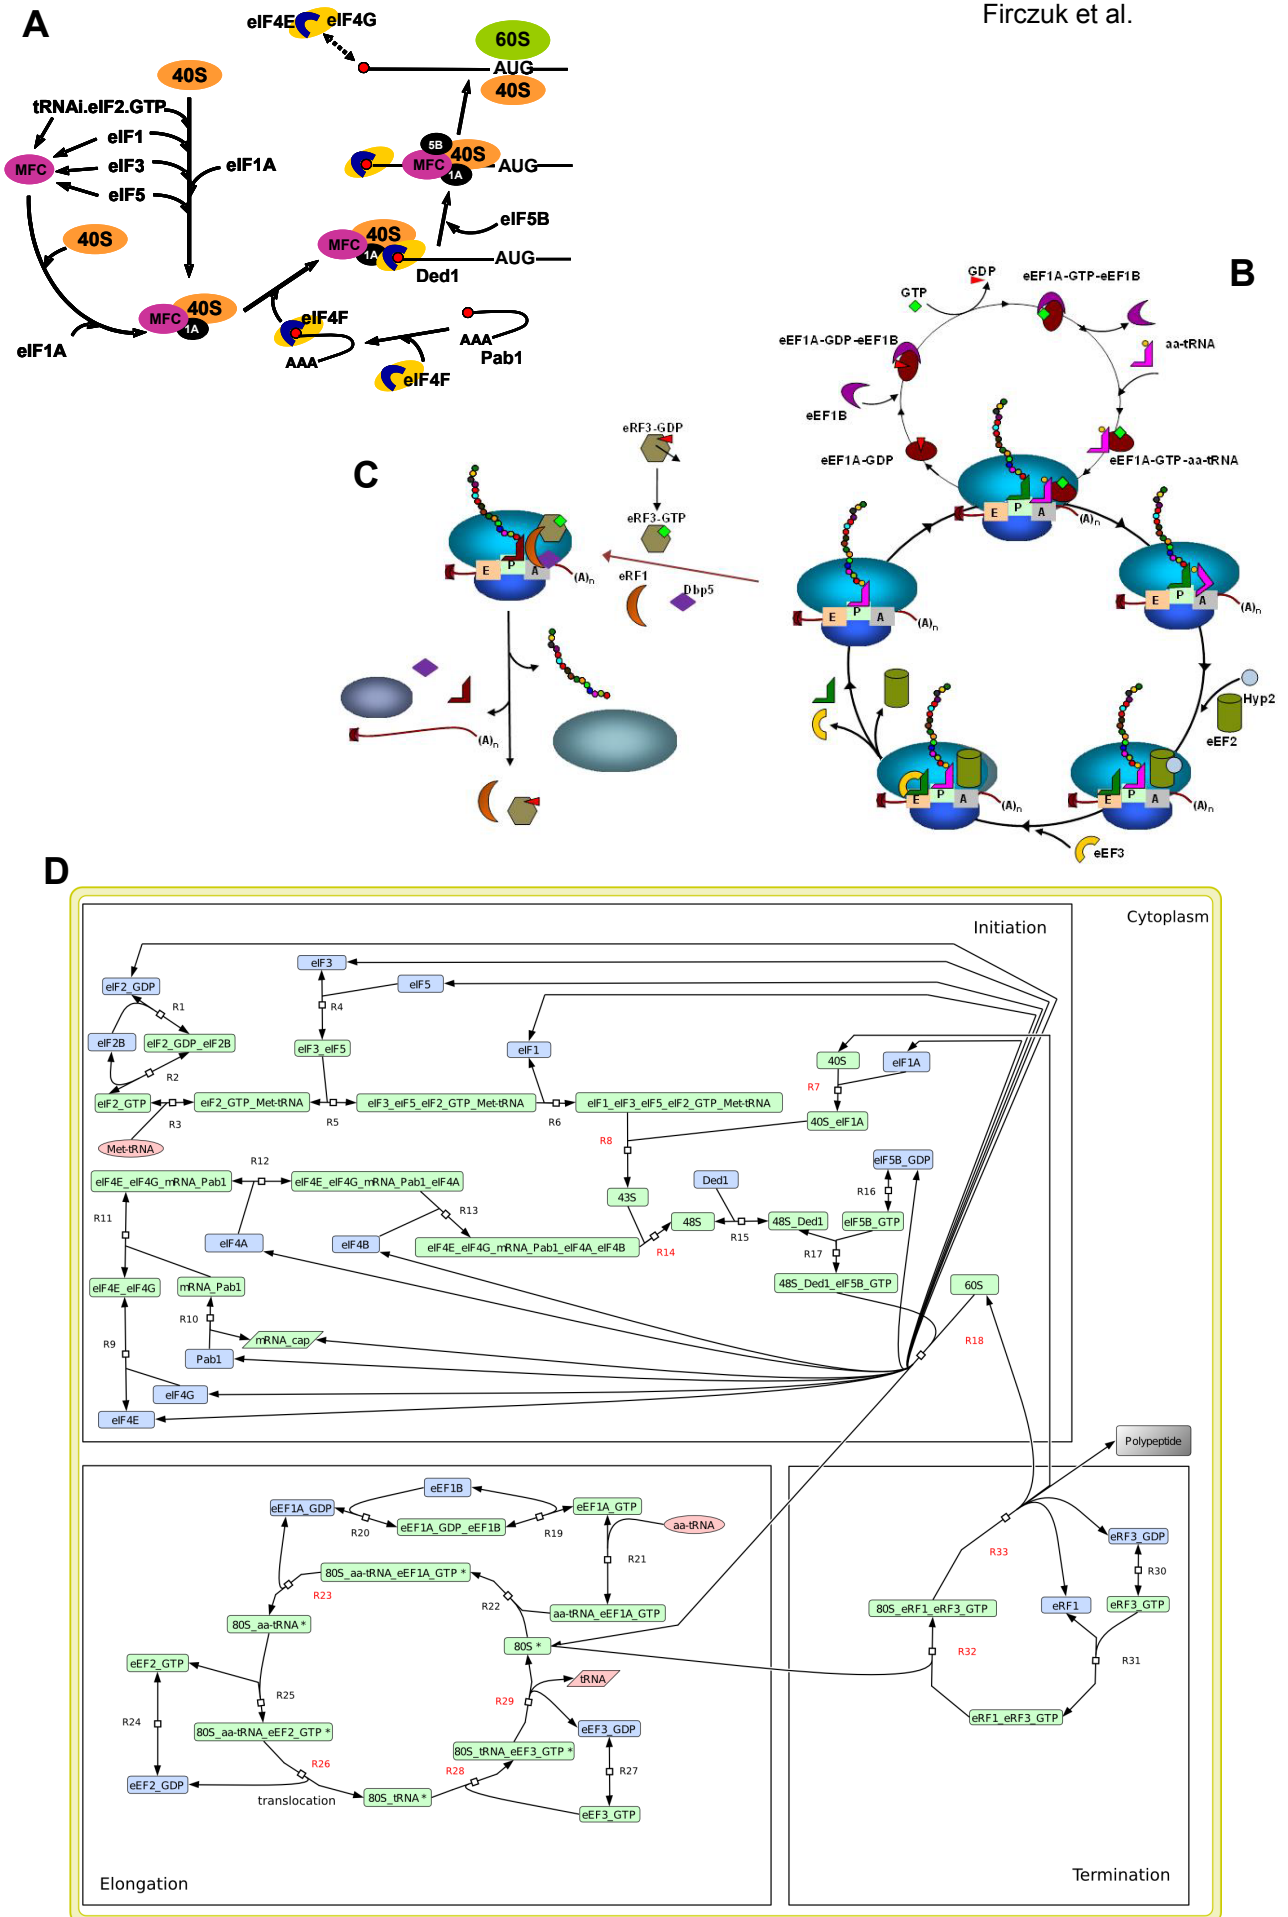

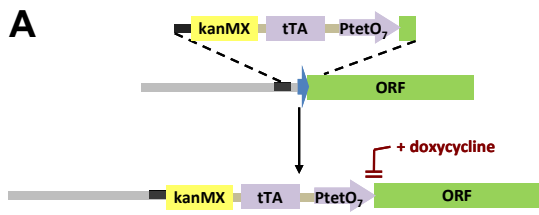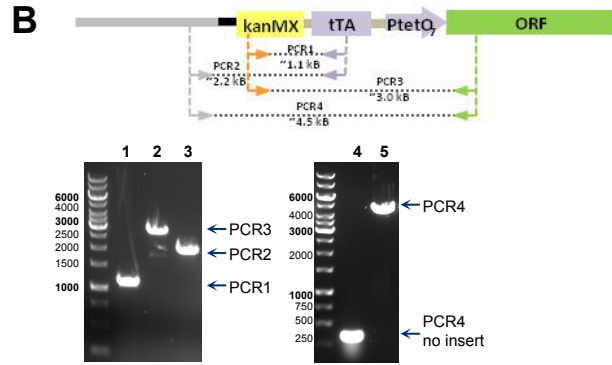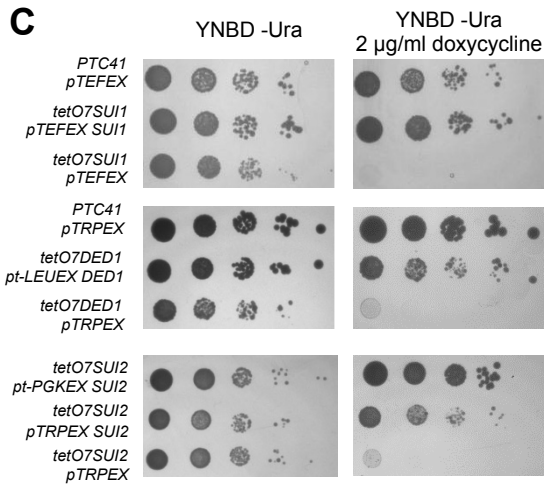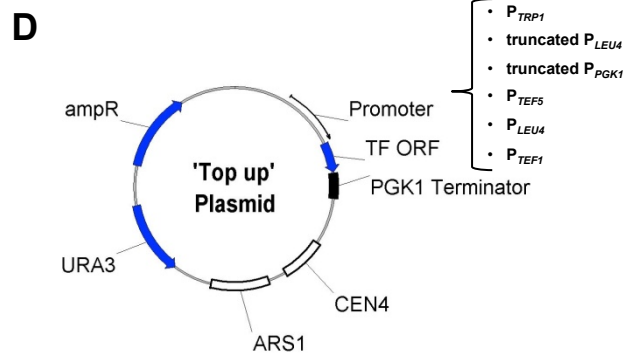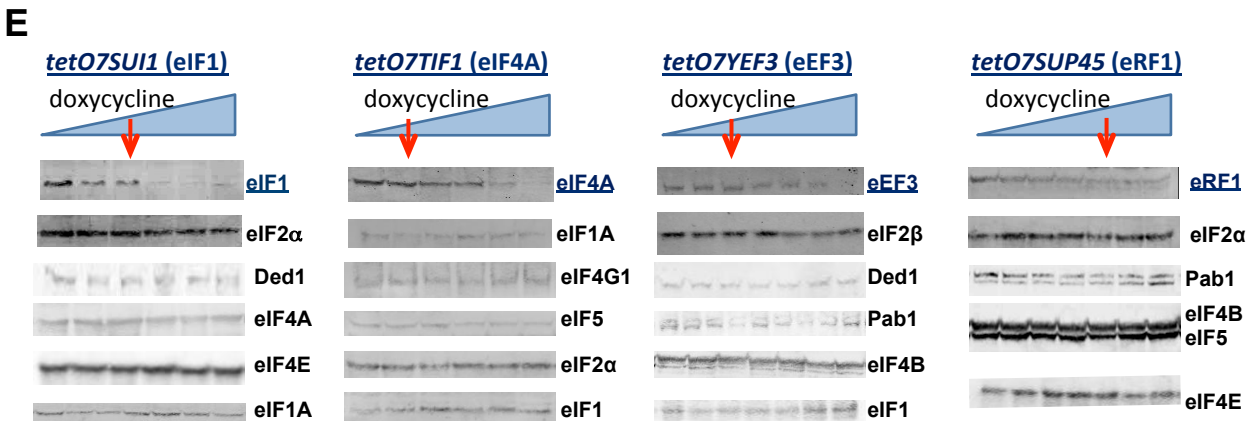

**F**

|                            |               | Relative abundance (% of WT) |       |       |        |       |       |      |      |      |      |
|----------------------------|---------------|------------------------------|-------|-------|--------|-------|-------|------|------|------|------|
|                            |               | eIF2 $\alpha$                | eIF4A | eIF4E | eIF4G1 | eEF1A | eEF1B | eEF2 | eEF3 | eRF1 | Dbp5 |
| Factor under tetO7 control | eIF2 $\alpha$ | 54                           | 102   | 98    | 101    | 104   | 102   | 103  | 94   | 105  | 90   |
|                            | eIF4A         | 109                          | 62    | 103   | 105    | 104   | 98    | 101  | 101  | 99   | 97   |
|                            | eIF4E         | 106                          | 101   | 48    | 94     | 103   | 107   | 100  | 100  | 104  | 92   |
|                            | eIF4G1        | 102                          | 100   | 104   | 63     | 98    | 99    | 98   | 104  | 98   | 101  |
|                            | eEF1A         | 110                          | 104   | 102   | 102    | 71    | 102   | 106  | 106  | 103  | 96   |
|                            | eEF1B         | 109                          | 101   | 108   | 106    | 101   | 30    | 113  | 104  | 96   | 102  |
|                            | eEF2          | 100                          | 101   | 105   | 102    | 106   | 81    | 29   | 101  | 106  | 107  |
|                            | eEF3          | 100                          | 99    | 103   | 97     | 98    | 92    | 115  | 68   | 109  | 101  |
|                            | eRF1          | 104                          | 99    | 99    | 101    | 98    | 98    | 102  | 104  | 57   | 101  |
|                            | Dbp5          | 101                          | 95    | 103   | 99     | 102   | 91    | 91   | 104  | 95   | 37   |



**A**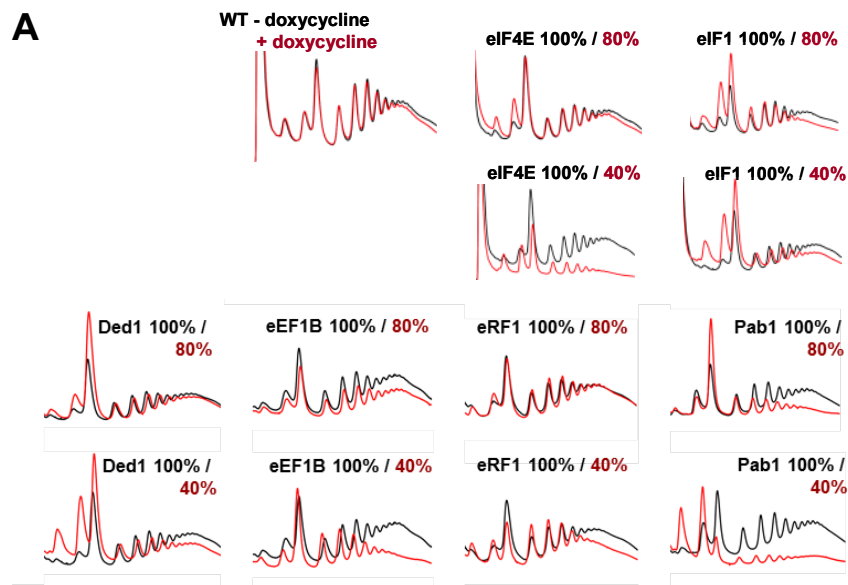**B**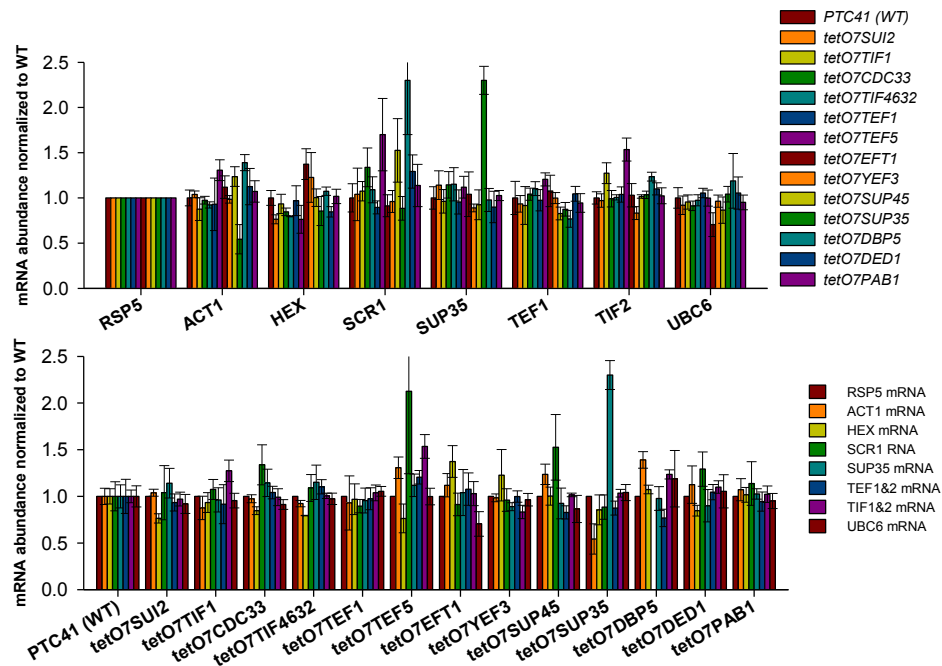**C**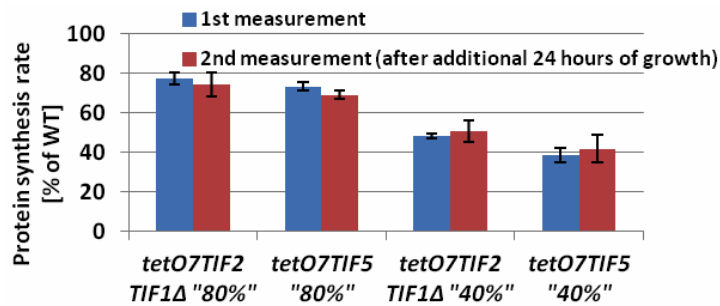

**Supplementary Figure 3**  
Firczuk et al.

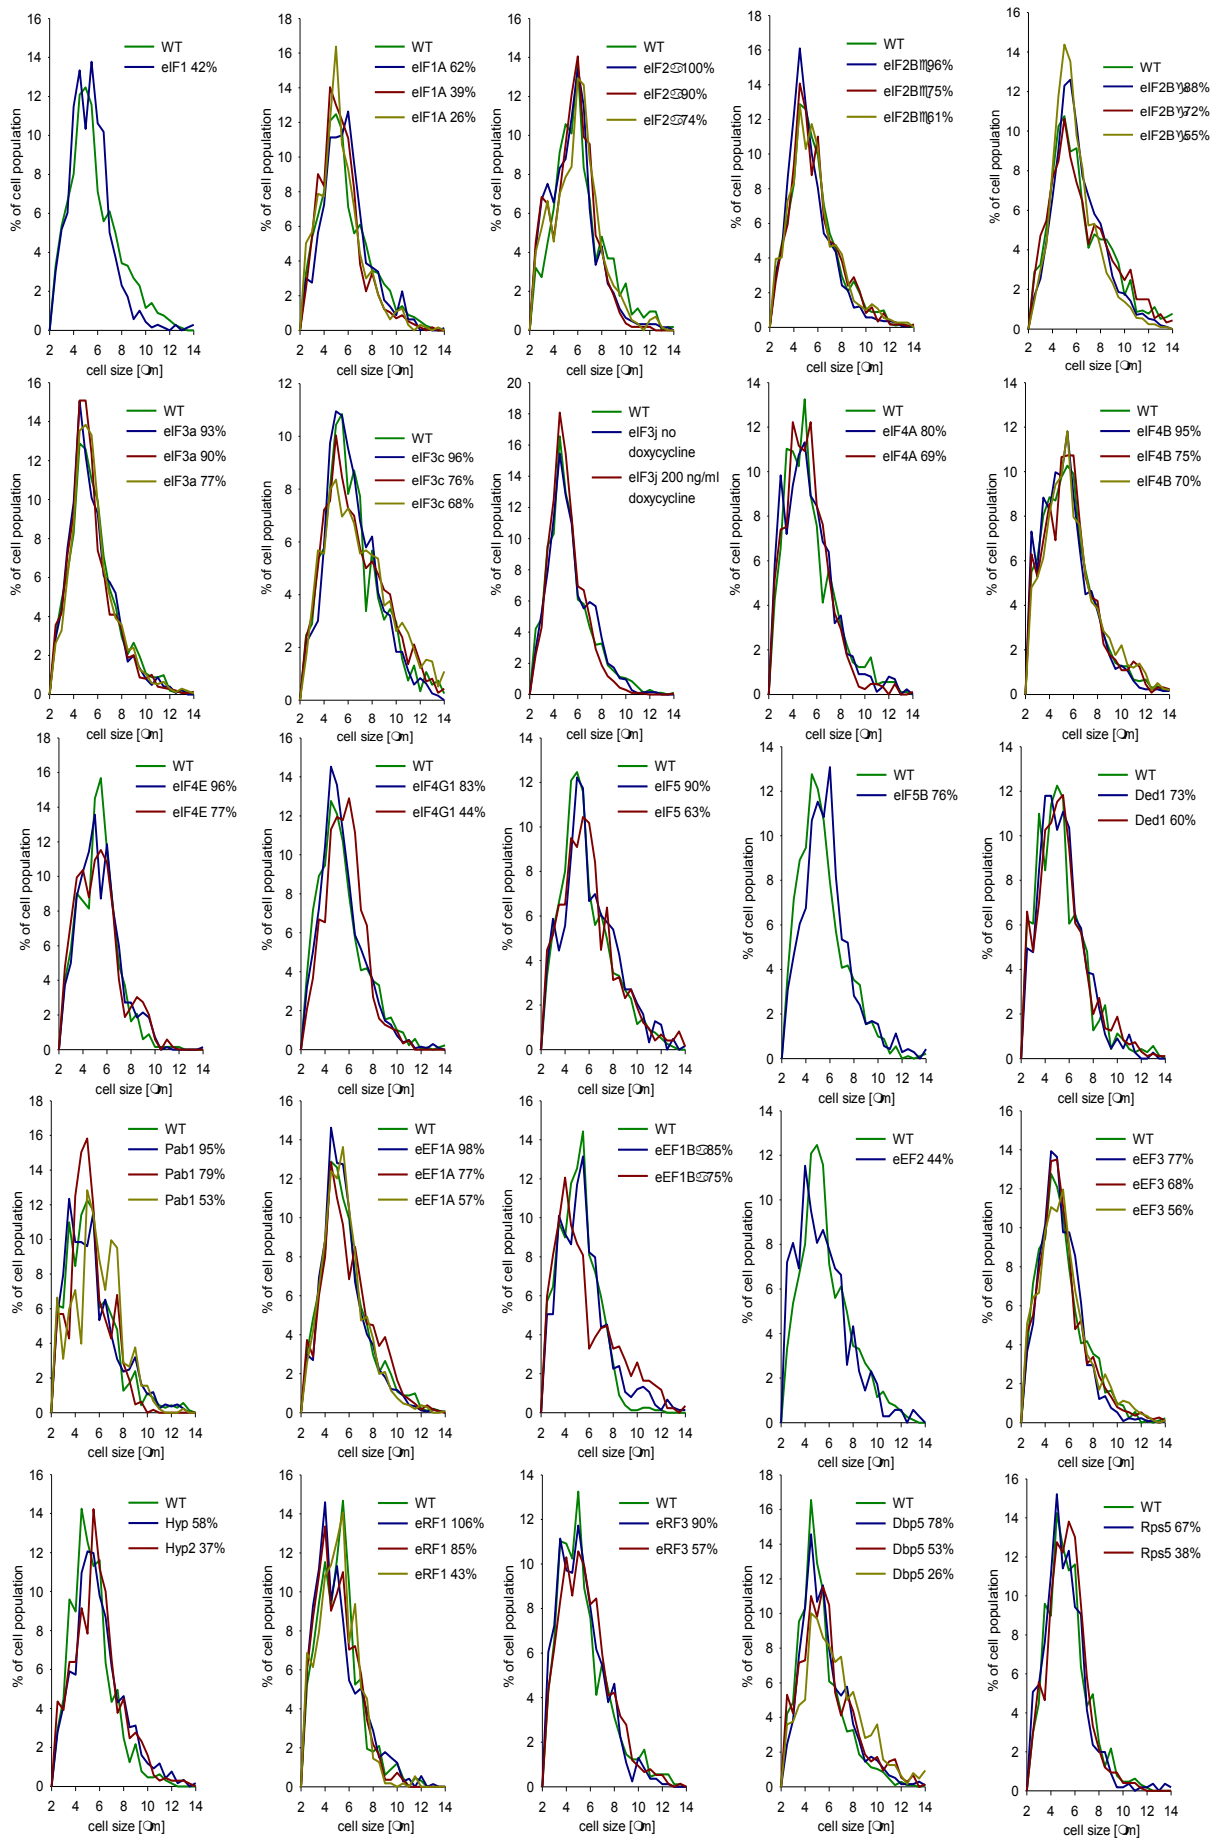

**Supplementary Figure 4**  
Firczuk et al.

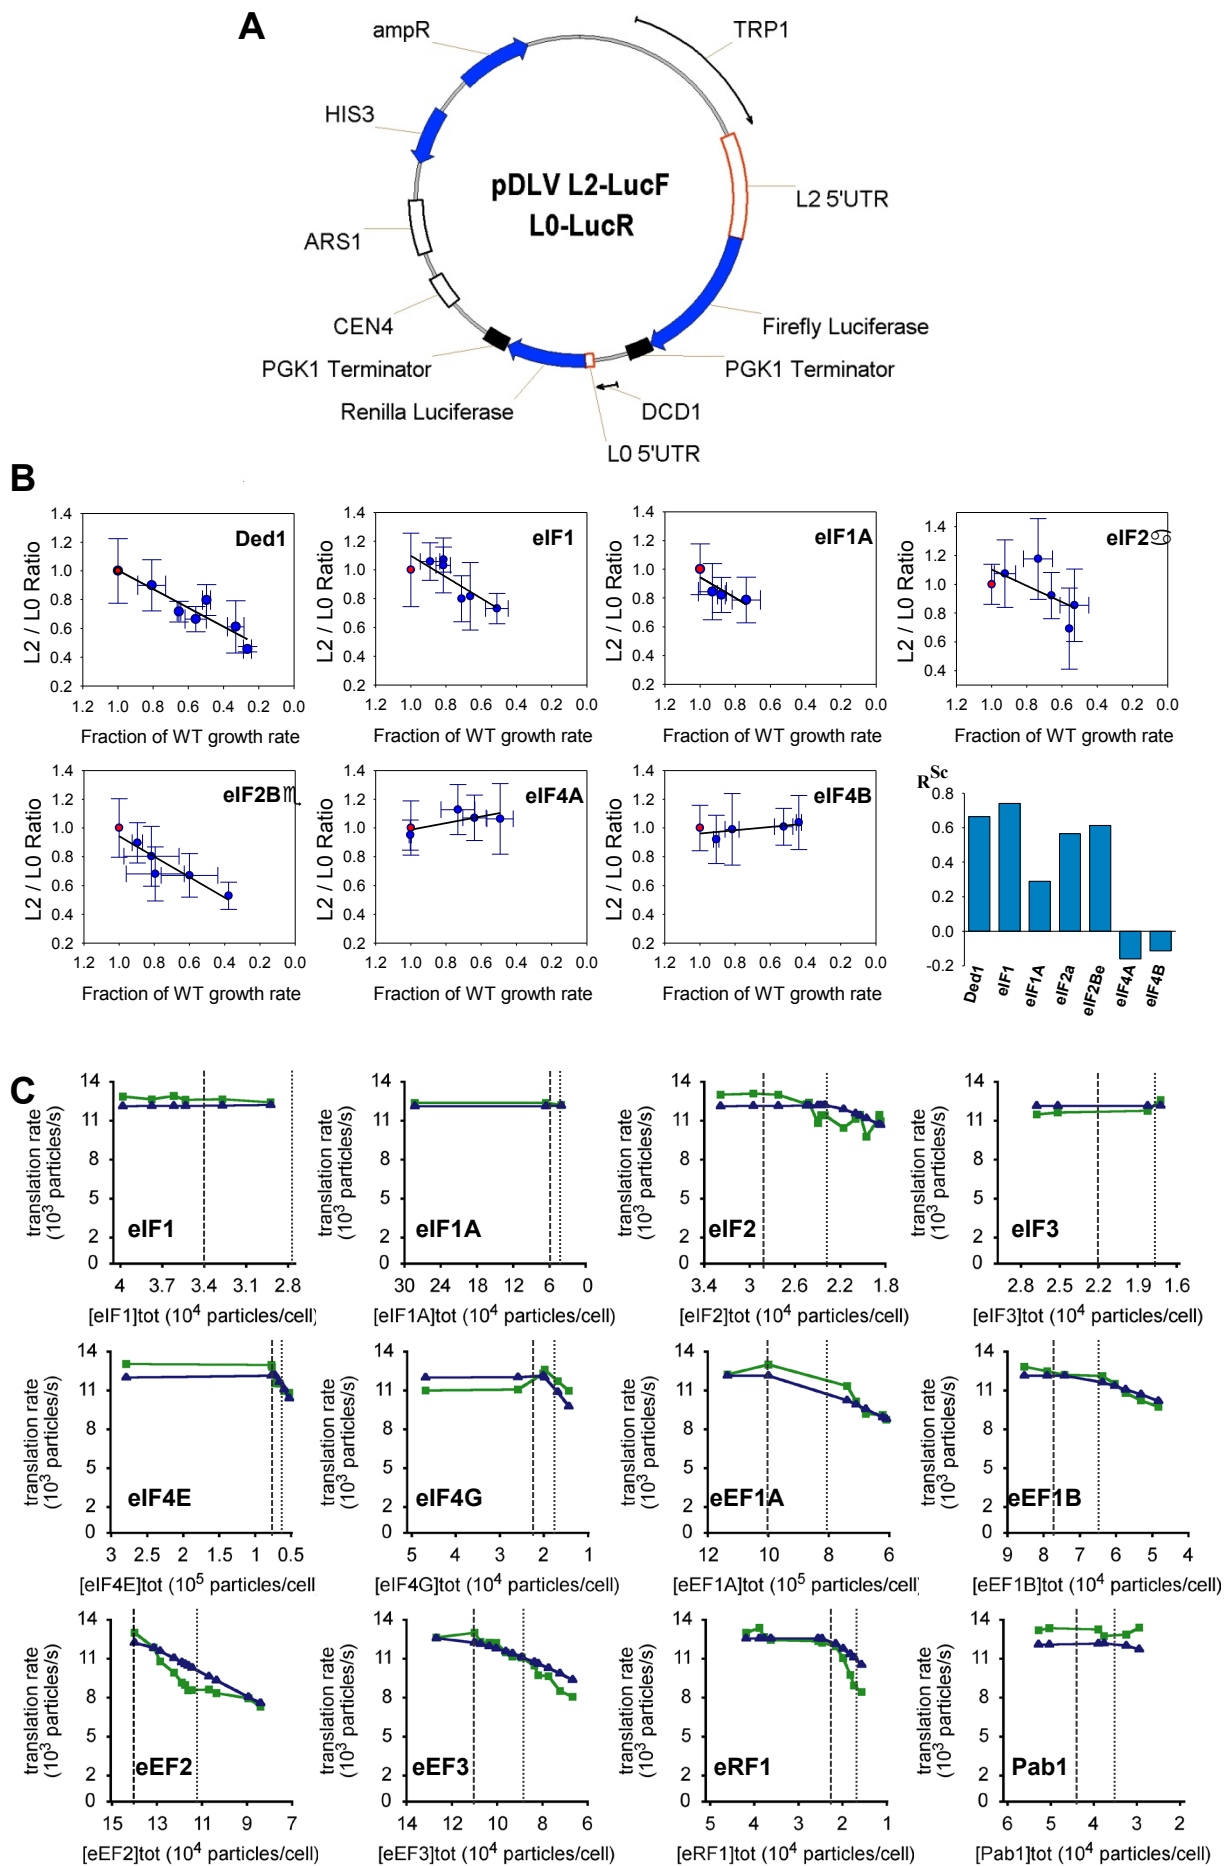

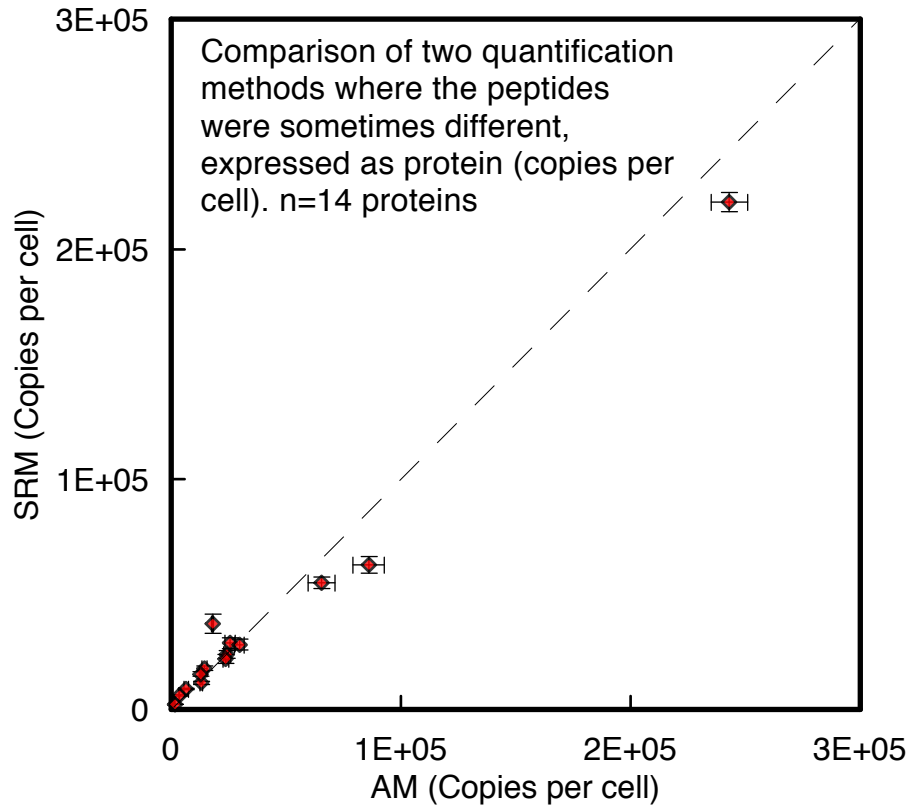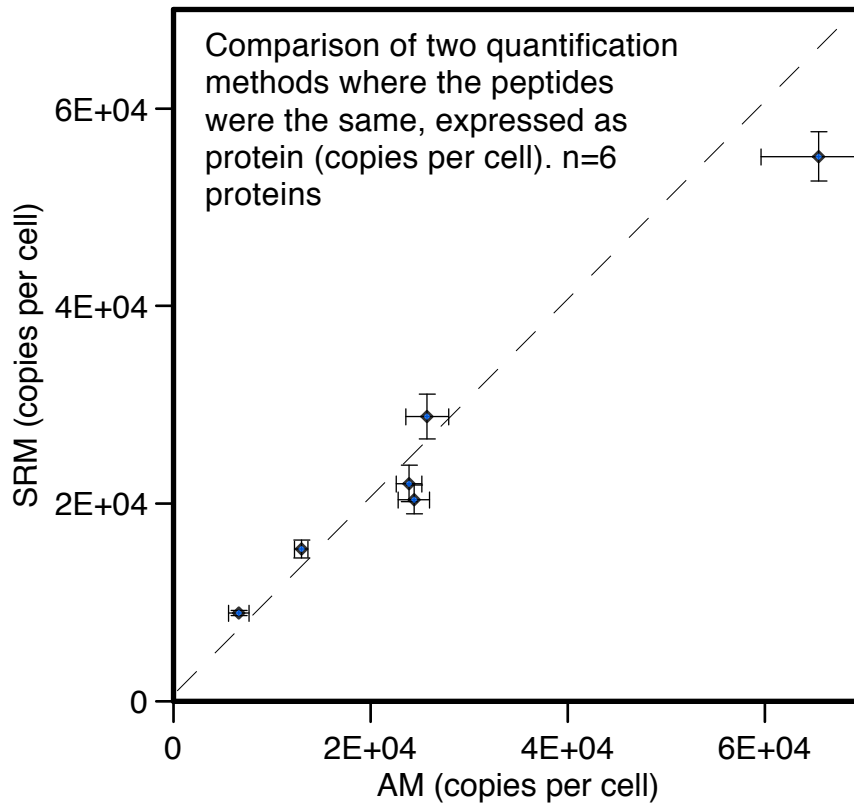

**Supplementary Figure 1.** Schematic representation of the initiation (*A*), elongation (*B*) and termination (*C*) phases of translation. Panel *D* shows the overall reaction scheme used in the computational model. In order to keep the demand for computational capacity to a reasonable level, it was assumed that elongation cycled through a twenty-codon open reading frame. The full set of model equations are given elsewhere in the Supplementary Information section.

**Supplementary Figure 2.** Construction and analysis of *tet07* chromosomal integration strains. (A) Scheme for integration of the *tet07* regulatory cassette 5' of each translation factor gene. (B) Illustration of the method for PCR validation of the chromosomal integrations. The schematic diagram indicates which PCR products are expected from a successful integration experiment, while the stained agarose gels confirm that the expected bands are indeed generated from total genomic DNA, in this case from the *tet07 SUI1* strain. (C) Complementation of *tet07* phenotypes was used to confirm correct integration into the chromosome. Three examples are shown: in each case the slow-growth phenotype in the *tet07* strain was fully complemented by transformation using a plasmid bearing the corresponding gene transcribed from a constitutive promoter – this was one of the 'top-up' plasmids referred to in the main text and illustrated in panel D. No complementation was observed if an empty 'top-up' plasmid was used. (D) Six different promoters were used in the respective versions of the 'top-up' plasmid – these were engineered to provide a wide spread of transcription rates. (E) Examples of doxycycline titrations of the intracellular abundance of translation factors under the control of the *tet07* regulatory system. The Western blots reveal how the intracellular abundance of each translation factor encoded by its corresponding *tet07* regulatory system (underlined) was suppressed to varying degrees in response to the presence of different amounts of doxycycline. The vertical red arrows indicate at which point global protein synthesis was nearest to being 80% of the physiological rate. Other factor levels in each strain (i.e. those not under the control of the *tet07* regulatory system) were not detectably affected by the presence of doxycycline. Quantitation was normalized against hexokinase. (F) Table showing the relative abundance of translation factors in ten different *tet07* strains (those manifesting  $R_1' > 0$ ) as determined by calibrated Western blotting. In all cases, data are shown for experiments where the protein synthesis rate had been suppressed to below 80% of the physiological level.

**Supplementary Figure 3.** Rate control data for the translation factors. (A) Sucrose density-gradient analysis reveals changes in the ribosome loading distributions on yeast mRNA. These examples include a wild-type control (lacking any chromosomal *tet07* construct; without doxycycline and plus 8 $\mu$ g ml<sup>-1</sup> doxycycline, i.e. higher than used with any of the *tet07* strains), and data for the *tet07CDC33* (eIF4E), *tet07SUI1* (eIF1), *tet07DED1* (Ded1), *tet07TEF5* (eEF1B), *tet07SUP45* (eRF1), and *tet07PAB1* (Pab1) strains (Table S1). (B) Intracellular mRNA abundance data [ordered along the X-axis according to mRNA species (top) and strain (bottom)] as estimated using RT-qPCR and expressed as a fraction of *RPS5* mRNA, averaged for at least 4 biological replicates and, for ease of comparison, normalized against the wild-type level. The error bars represent standard deviations. In the *tet07SUP35* strain, transcription of *SUP35* is higher than in the wild-type strain. (C) Comparison of suppression of protein synthesis in the strains *tet07TIF2* (eIF4A) and *tet07TIF5* (eIF5) after incubation with doxycycline for the period used in experimental work described in this paper and also after an additional 24 hours. The degree of inhibition is stably maintained and there is no sign of any compensatory mutations. This is consistent with our finding that up-regulation of the activity of individual factors does not generally lead to increases in global translation.

**Supplementary Figure 4.** Analysis of cell-size distributions. Histograms of cell size – each plot shows the distribution of cell diameters across a population of cells from each strain at the stated concentrations of doxycycline. Labelling of the colour-coded plots indicates to what degree the growth of each cell population was inhibited (as a percentage of the wild-type growth rate).



**Supplementary Figure 5.** Determination of the scanning ratio for the translation factors. (A) The scanning ratio assay plasmid. This contains two independent promoters ( $P_{TRP1}$  and  $P_{DCD1}$ ) of comparable strength coupled to a short (L0; 65 nucleotides) and a long (L2; 1240 nucleotides) 5'UTR (Berthelot et al. 2004). Expression from the two promoter/5'UTR combinations was measured via the activities of the firefly and renilla luciferase reporters, respectively. (B) Plots of the L2/L0 ratio versus growth rate. The bar graph summarizes the  $R^{Sc}$  values for those factors where  $R^{Sc}$  is not zero. While most *tet07* strains showed no change in the L2/L0 ratio as a function of modulation of intracellular factor abundance, five strains manifested a positive dependence of this ratio on factor abundance. Most other strains showed a slope of zero (data not shown), and a small number manifested a small negative value for  $R^{Sc}$  (two examples are shown here: eIF4A and eIF4B). The negative slopes were small relative to the error estimates, and we therefore counted these results and the zero slope results as 'no change' (see Table 1). Since negative values for  $R^{Sc}$  would indicate a lack of enhancement of scanning by the factor under study, this mode of categorization is consistent with our procedure for identifying factors that stabilize scanning on longer 5'UTRs. The red point, set at 1.0 in each case, is the ratio observed for the wild type strain in which the addition of doxycycline does not affect the abundance of any of the translation factors. (C) Outputs from the computational model. The *in silico* translation machinery manifests properties that closely resemble those of the *in vivo* system. Here we see the relationship between global protein synthesis rate and the intracellular abundance of each factor. Each plot features the experimental data (green; rate of global protein synthesis vs molecules of translation factor per cell) compared to the predicted relationship from the model (blue). The vertical lines indicate the points on the x-axis (intracellular abundance in molecules per cell) at the 100% physiological level (dashed) and at the 80% level (dotted).

Berthelot K, Muldoon M, Rajkowitsch L, Hughes J, McCarthy JEG (2004) Dynamics and processivity of 40S ribosome scanning on mRNA in yeast. *Mol. Microbiol.* **51**: 987–1001

**Supplementary Figure 6.** Comparison of Accurate Mass (AM) and Selected Reaction Monitoring (SRM) quantitation. Some proteins in the study were quantified by both AM and SRM approaches (see Materials and Methods section). For these proteins, the quantitation values were compared either for all peptides (top panel) or using the same peptide for each protein (lower panel).
