# Supplementary material for: An in vivo control map for the eukaryotic mRNA translation machinery
Source: PubMed Central journal article supplement — Mol Syst Biol. 2013 Jan 22;9:635. doi: 10.1038/msb.2012.73 (PMC3564266; doi:10.1038/msb.2012.73), 2013-01-22
Supplement: msb201273-s4.pdf [file msb201273-s4.pdf]

## An in vivo control map for the eukaryotic mRNA translation machinery

Helena Firczuk, Shichina Kannambath, Juergen Pahle, Amy Claydon, Robert Beynon, John Duncan, Hans Westerhoff, Pedro Mendes, John E.G. McCarthy

*Corresponding author: John E.G. McCarthy, University of Warwick*

---

|                         |                    |                   |
|-------------------------|--------------------|-------------------|
| <b>Review timeline:</b> | Submission date:   | 23 September 2012 |
|                         | Revision received: | 12 November 2012  |
|                         | Accepted:          | 16 December 2012  |

---

No Peer Review Process File is available with this article, as the authors have chosen not to make the review process public in this case.
